# Supplementary material
Source: publisher figshare collection journal article supplement (https://gsajournals.figshare.com/ndownloader/files/13109798)
Supplement: Supplementary file 1 [file 13109798]

## Sheet: Use of hash tables
Legend for hash tables
Distance category	Distance between polymorphisms: 0 = <10, 1 = <100, 2 = <1000, 3 = <10000, 4 = <100000, 5 = >=100000													6 values for distance (measured on a log scale)
MAF category SNP1	Frequency class of the minor allele at the first SNP: 0 = less than 2%, 1 = less than 4%, 2 = less than 6%, … 24 = less than 50%, 25 = 50%.													26 values for p1 (frequency ranging from 0 to 0.5 in units of 0.02)
MAF category SNP2	Frequency class of the minor allele at the second SNP: 0 = less than 2%, 1 = less than 4%, 2 = less than 6%, … 24 = less than 50%, 25 = 50%.													26 values for p2 (frequency ranging from 0 to p1 in units of 0.02):: p2<=p1
D' category	Bins spanning the range of Lewontin's D' : 0 = minimum value (negative), … 10 = maximum value (positive)													11 values for D' (9 intermediates uniformly distributed between Dlow and Dhigh)
Number of observations	Number of SNPs corresponding to preceding series of values for distance, allele frequencies, and D value.
Proportion of total	Preceding value expressed as a proportion of the total for distance and allele frequencies, i.e. the estimated probability distribution for D'.
SNP2 is the defined as the one of the pair with the lowest MAF
																		272
																		238
Calculation of hash tables																		34
We analyzed the vcf file from Signor et al (2018) using three python scripts (LD.analysis1.py, LD.analysis2.py, LD.analysis3.py) provided here as a Supplemental file.
We limited our attention to 172 "Sz" samples and only considered genotype calls to homozygote "0/0" or "1/1" (missing data otherwise).
We compared each SNP to all other SNPs within 300kb downstream on the same chromosome.
For each pair of SNPs, we counted the four haplotypes (gametes) and included the data only if the total was 100 or greater.
Given haplotype frequencies, we first determine the frequency fo the minor allele at each site (p1, p2).
Given p1 and p2, we calcuated the minimum and maximum possible for D' (D' min=-p1*p2, D' max = Min[p1,p2]*(1-Max[p1,p2]). This was used to define bins spanning the range.
Finally, we caculated D' given the haplotype frequencies for this pair of sites, and increment the appropiate D' category (Number of observations column) in table.
Procedure
Simulated chromosomes were formed to initiate simulations using using observed Ancestral allele frequencies combined with information from hash tables (next sheet) specific either to autosomes or the X-chromosome.
We defined a collection of target sites distributed uniformly over the genome every 500kb. A "wild sampled" chromosome was started by randomly sampling alleles at these target loci. When fitness determining loci were included in a simulation, they were always a subset of the target loci.
We then sampled alleles at all 'partner sites' of these target loci (all other SNP locations within 250kb of each target).
Given allele frequencies at both sites, and the 2-locus haplotype frequencies from the hash table, and the already sampled allele at the target locus, we calculate the probability of reference versus alternative base at the partner site. We then sample based on this probability.
There were sufficient observations in regular recombination regions to estimate distinct hash tables for the autosomes and X chromosome.
The tables on next sheet are based on these analyses.

## Sheet: hash tables
Autosomal haplotypes							X haplotypes
Distance category	MAF category SNP1	MAF category SNP2	D' category	Number of observations	Proportion of total		Distance category	MAF category SNP1	MAF category SNP2	D' category	Number of observations	Proportion of total
0	0	0	0	41790	0.366917		0	0	0	0	4227	0.266368
0	0	0	1	0	0		0	0	0	1	0	0
0	0	0	2	0	0		0	0	0	2	0	0
0	0	0	3	2	1.756e-05		0	0	0	3	0	0
0	0	0	4	2	1.756e-05		0	0	0	4	1	6.30159e-05
0	0	0	5	5	4.39001e-05		0	0	0	5	0	0
0	0	0	6	4	3.51201e-05		0	0	0	6	0	0
0	0	0	7	0	0		0	0	0	7	0	0
0	0	0	8	0	0		0	0	0	8	0	0
0	0	0	9	0	0		0	0	0	9	0	0
0	0	0	10	72092	0.632969		0	0	0	10	11641	0.733569
0	1	0	0	53430	0.899238		0	1	0	0	4126	0.837937
0	1	0	1	0	0		0	1	0	1	0	0
0	1	0	2	0	0		0	1	0	2	0	0
0	1	0	3	13	0.000218793		0	1	0	3	1	0.000203087
0	1	0	4	12	0.000201962		0	1	0	4	0	0
0	1	0	5	10	0.000168302		0	1	0	5	2	0.000406174
0	1	0	6	3	5.04906e-05		0	1	0	6	2	0.000406174
0	1	0	7	0	0		0	1	0	7	0	0
0	1	0	8	0	0		0	1	0	8	0	0
0	1	0	9	0	0		0	1	0	9	0	0
0	1	0	10	5949	0.100123		0	1	0	10	793	0.161048
0	1	1	0	20227	0.268398		0	1	1	0	1260	0.161084
0	1	1	1	0	0		0	1	1	1	0	0
0	1	1	2	12	0.000159231		0	1	1	2	1	0.000127845
0	1	1	3	7	9.2885e-05		0	1	1	3	0	0
0	1	1	4	11	0.000145962		0	1	1	4	1	0.000127845
0	1	1	5	3	3.98079e-05		0	1	1	5	1	0.000127845
0	1	1	6	12	0.000159231		0	1	1	6	0	0
0	1	1	7	19	0.000252116		0	1	1	7	4	0.000511378
0	1	1	8	11	0.000145962		0	1	1	8	0	0
0	1	1	9	0	0		0	1	1	9	0	0
0	1	1	10	55060	0.730607		0	1	1	10	6555	0.838021
0	2	0	0	39380	0.893335		0	2	0	0	2946	0.817879
0	2	0	1	0	0		0	2	0	1	0	0
0	2	0	2	0	0		0	2	0	2	0	0
0	2	0	3	5	0.000113425		0	2	0	3	1	0.000277624
0	2	0	4	7	0.000158795		0	2	0	4	1	0.000277624
0	2	0	5	15	0.000340275		0	2	0	5	1	0.000277624
0	2	0	6	6	0.00013611		0	2	0	6	2	0.000555247
0	2	0	7	0	0		0	2	0	7	0	0
0	2	0	8	0	0		0	2	0	8	0	0
0	2	0	9	0	0		0	2	0	9	0	0
0	2	0	10	4669	0.105916		0	2	0	10	651	0.180733
0	2	1	0	30924	0.865733		0	2	1	0	1730	0.765148
0	2	1	1	3	8.39866e-05		0	2	1	1	0	0
0	2	1	2	13	0.000363942		0	2	1	2	1	0.000442282
0	2	1	3	5	0.000139978		0	2	1	3	1	0.000442282
0	2	1	4	18	0.000503919		0	2	1	4	0	0
0	2	1	5	8	0.000223964		0	2	1	5	0	0
0	2	1	6	31	0.000867861		0	2	1	6	2	0.000884564
0	2	1	7	16	0.000447928		0	2	1	7	2	0.000884564
0	2	1	8	20	0.00055991		0	2	1	8	1	0.000442282
0	2	1	9	0	0		0	2	1	9	0	0
0	2	1	10	4682	0.131075		0	2	1	10	524	0.231756
0	2	2	0	12285	0.218454		0	2	2	0	661	0.120841
0	2	2	1	6	0.000106693		0	2	2	1	1	0.000182815
0	2	2	2	5	8.8911e-05		0	2	2	2	2	0.000365631
0	2	2	3	3	5.33466e-05		0	2	2	3	3	0.000548446
0	2	2	4	5	8.8911e-05		0	2	2	4	0	0
0	2	2	5	5	8.8911e-05		0	2	2	5	0	0
0	2	2	6	8	0.000142258		0	2	2	6	0	0
0	2	2	7	9	0.00016004		0	2	2	7	1	0.000182815
0	2	2	8	30	0.000533466		0	2	2	8	0	0
0	2	2	9	0	0		0	2	2	9	0	0
0	2	2	10	43880	0.780283		0	2	2	10	4802	0.877879
0	3	0	0	31344	0.881316		0	3	0	0	2529	0.834378
0	3	0	1	0	0		0	3	0	1	0	0
0	3	0	2	0	0		0	3	0	2	0	0
0	3	0	3	5	0.000140588		0	3	0	3	2	0.000659848
0	3	0	4	11	0.000309293		0	3	0	4	2	0.000659848
0	3	0	5	15	0.000421763		0	3	0	5	0	0
0	3	0	6	5	0.000140588		0	3	0	6	2	0.000659848
0	3	0	7	0	0		0	3	0	7	0	0
0	3	0	8	0	0		0	3	0	8	0	0
0	3	0	9	0	0		0	3	0	9	0	0
0	3	0	10	4185	0.117672		0	3	0	10	496	0.163642
0	3	1	0	26292	0.867637		0	3	1	0	1432	0.780807
0	3	1	1	1	3.3e-05		0	3	1	1	0	0
0	3	1	2	11	0.000363		0	3	1	2	2	0.00109051
0	3	1	3	7	0.000231		0	3	1	3	1	0.000545256
0	3	1	4	8	0.000264		0	3	1	4	1	0.000545256
0	3	1	5	7	0.000231		0	3	1	5	1	0.000545256
0	3	1	6	20	0.000660001		0	3	1	6	2	0.00109051
0	3	1	7	15	0.000495		0	3	1	7	3	0.00163577
0	3	1	8	16	0.000528		0	3	1	8	1	0.000545256
0	3	1	9	0	0		0	3	1	9	0	0
0	3	1	10	3926	0.129558		0	3	1	10	391	0.213195
0	3	2	0	20671	0.849679		0	3	2	0	1106	0.739305
0	3	2	1	16	0.000657678		0	3	2	1	2	0.0013369
0	3	2	2	8	0.000328839		0	3	2	2	2	0.0013369
0	3	2	3	9	0.000369944		0	3	2	3	0	0
0	3	2	4	14	0.000575469		0	3	2	4	1	0.000668449
0	3	2	5	13	0.000534364		0	3	2	5	0	0
0	3	2	6	10	0.000411049		0	3	2	6	0	0
0	3	2	7	12	0.000493259		0	3	2	7	1	0.000668449
0	3	2	8	33	0.00135646		0	3	2	8	3	0.00200535
0	3	2	9	0	0		0	3	2	9	0	0
0	3	2	10	3542	0.145594		0	3	2	10	381	0.254679
0	3	3	0	8798	0.192142		0	3	3	0	408	0.0863309
0	3	3	1	8	0.000174715		0	3	3	1	1	0.000211595
0	3	3	2	3	6.55179e-05		0	3	3	2	1	0.000211595
0	3	3	3	7	0.000152875		0	3	3	3	0	0
0	3	3	4	8	0.000174715		0	3	3	4	0	0
0	3	3	5	10	0.000218393		0	3	3	5	0	0
0	3	3	6	6	0.000131036		0	3	3	6	0	0
0	3	3	7	12	0.000262072		0	3	3	7	0	0
0	3	3	8	21	0.000458625		0	3	3	8	0	0
0	3	3	9	7	0.000152875		0	3	3	9	0	0
0	3	3	10	36909	0.806067		0	3	3	10	4316	0.913246
0	4	0	0	24568	0.86911		0	4	0	0	2208	0.811765
0	4	0	1	0	0		0	4	0	1	0	0
0	4	0	2	0	0		0	4	0	2	0	0
0	4	0	3	1	3.53757e-05		0	4	0	3	0	0
0	4	0	4	5	0.000176878		0	4	0	4	2	0.000735294
0	4	0	5	8	0.000283006		0	4	0	5	0	0
0	4	0	6	3	0.000106127		0	4	0	6	2	0.000735294
0	4	0	7	0	0		0	4	0	7	0	0
0	4	0	8	0	0		0	4	0	8	0	0
0	4	0	9	0	0		0	4	0	9	0	0
0	4	0	10	3683	0.130289		0	4	0	10	508	0.186765
0	4	1	0	21736	0.864048		0	4	1	0	1172	0.783946
0	4	1	1	3	0.000119256		0	4	1	1	0	0
0	4	1	2	5	0.00019876		0	4	1	2	1	0.000668896
0	4	1	3	3	0.000119256		0	4	1	3	0	0
0	4	1	4	6	0.000238512		0	4	1	4	0	0
0	4	1	5	9	0.000357767		0	4	1	5	0	0
0	4	1	6	23	0.000914295		0	4	1	6	0	0
0	4	1	7	13	0.000516775		0	4	1	7	2	0.00133779
0	4	1	8	9	0.000357767		0	4	1	8	2	0.00133779
0	4	1	9	0	0		0	4	1	9	0	0
0	4	1	10	3349	0.133129		0	4	1	10	318	0.212709
0	4	2	0	17240	0.84427		0	4	2	0	986	0.777603
0	4	2	1	18	0.000881489		0	4	2	1	3	0.00236593
0	4	2	2	8	0.000391773		0	4	2	2	0	0
0	4	2	3	7	0.000342801		0	4	2	3	0	0
0	4	2	4	8	0.000391773		0	4	2	4	0	0
0	4	2	5	12	0.000587659		0	4	2	5	0	0
0	4	2	6	11	0.000538688		0	4	2	6	0	0
0	4	2	7	13	0.000636631		0	4	2	7	2	0.00157729
0	4	2	8	24	0.00117532		0	4	2	8	1	0.000788643
0	4	2	9	0	0		0	4	2	9	0	0
0	4	2	10	3079	0.150784		0	4	2	10	276	0.217666
0	4	3	0	14664	0.826886		0	4	3	0	752	0.711447
0	4	3	1	12	0.000676666		0	4	3	1	0	0
0	4	3	2	13	0.000733055		0	4	3	2	0	0
0	4	3	3	8	0.000451111		0	4	3	3	0	0
0	4	3	4	9	0.0005075		0	4	3	4	1	0.000946074
0	4	3	5	13	0.000733055		0	4	3	5	1	0.000946074
0	4	3	6	13	0.000733055		0	4	3	6	1	0.000946074
0	4	3	7	8	0.000451111		0	4	3	7	0	0
0	4	3	8	23	0.00129694		0	4	3	8	0	0
0	4	3	9	13	0.000733055		0	4	3	9	1	0.000946074
0	4	3	10	2958	0.166798		0	4	3	10	301	0.284768
0	4	4	0	5950	0.161181		0	4	4	0	327	0.0817296
0	4	4	1	1	2.70893e-05		0	4	4	1	0	0
0	4	4	2	5	0.000135446		0	4	4	2	0	0
0	4	4	3	4	0.000108357		0	4	4	3	0	0
0	4	4	4	12	0.000325071		0	4	4	4	1	0.000249937
0	4	4	5	7	0.000189625		0	4	4	5	0	0
0	4	4	6	6	0.000162536		0	4	4	6	0	0
0	4	4	7	11	0.000297982		0	4	4	7	1	0.000249937
0	4	4	8	7	0.000189625		0	4	4	8	1	0.000249937
0	4	4	9	16	0.000433428		0	4	4	9	3	0.000749813
0	4	4	10	30896	0.83695		0	4	4	10	3668	0.916771
0	5	0	0	20406	0.858477		0	5	0	0	1704	0.767568
0	5	0	1	0	0		0	5	0	1	0	0
0	5	0	2	0	0		0	5	0	2	0	0
0	5	0	3	1	4.20698e-05		0	5	0	3	0	0
0	5	0	4	9	0.000378629		0	5	0	4	0	0
0	5	0	5	11	0.000462768		0	5	0	5	0	0
0	5	0	6	2	8.41397e-05		0	5	0	6	2	0.000900901
0	5	0	7	0	0		0	5	0	7	0	0
0	5	0	8	0	0		0	5	0	8	0	0
0	5	0	9	0	0		0	5	0	9	0	0
0	5	0	10	3341	0.140555		0	5	0	10	514	0.231532
0	5	1	0	19552	0.849939		0	5	1	0	1084	0.785507
0	5	1	1	3	0.000130412		0	5	1	1	0	0
0	5	1	2	10	0.000434707		0	5	1	2	3	0.00217391
0	5	1	3	11	0.000478178		0	5	1	3	1	0.000724638
0	5	1	4	7	0.000304295		0	5	1	4	0	0
0	5	1	5	8	0.000347766		0	5	1	5	1	0.000724638
0	5	1	6	8	0.000347766		0	5	1	6	1	0.000724638
0	5	1	7	12	0.000521648		0	5	1	7	1	0.000724638
0	5	1	8	3	0.000130412		0	5	1	8	0	0
0	5	1	9	0	0		0	5	1	9	0	0
0	5	1	10	3390	0.147366		0	5	1	10	289	0.20942
0	5	2	0	15283	0.841343		0	5	2	0	801	0.775411
0	5	2	1	13	0.000715662		0	5	2	1	0	0
0	5	2	2	8	0.000440407		0	5	2	2	0	0
0	5	2	3	5	0.000275255		0	5	2	3	0	0
0	5	2	4	7	0.000385357		0	5	2	4	0	0
0	5	2	5	7	0.000385357		0	5	2	5	0	0
0	5	2	6	9	0.000495458		0	5	2	6	2	0.00193611
0	5	2	7	6	0.000330305		0	5	2	7	1	0.000968054
0	5	2	8	22	0.00121112		0	5	2	8	2	0.00193611
0	5	2	9	0	0		0	5	2	9	0	0
0	5	2	10	2805	0.154418		0	5	2	10	227	0.219748
0	5	3	0	12747	0.83064		0	5	3	0	692	0.752174
0	5	3	1	12	0.000781963		0	5	3	1	0	0
0	5	3	2	12	0.000781963		0	5	3	2	0	0
0	5	3	3	10	0.000651636		0	5	3	3	0	0
0	5	3	4	9	0.000586472		0	5	3	4	0	0
0	5	3	5	14	0.00091229		0	5	3	5	0	0
0	5	3	6	9	0.000586472		0	5	3	6	0	0
0	5	3	7	20	0.00130327		0	5	3	7	1	0.00108696
0	5	3	8	13	0.000847126		0	5	3	8	0	0
0	5	3	9	11	0.000716799		0	5	3	9	3	0.00326087
0	5	3	10	2489	0.162192		0	5	3	10	224	0.243478
0	5	4	0	10393	0.797988		0	5	4	0	556	0.659549
0	5	4	1	10	0.000767813		0	5	4	1	1	0.00118624
0	5	4	2	6	0.000460688		0	5	4	2	0	0
0	5	4	3	12	0.000921376		0	5	4	3	0	0
0	5	4	4	10	0.000767813		0	5	4	4	2	0.00237248
0	5	4	5	10	0.000767813		0	5	4	5	2	0.00237248
0	5	4	6	17	0.00130528		0	5	4	6	1	0.00118624
0	5	4	7	12	0.000921376		0	5	4	7	2	0.00237248
0	5	4	8	15	0.00115172		0	5	4	8	3	0.00355872
0	5	4	9	20	0.00153563		0	5	4	9	1	0.00118624
0	5	4	10	2519	0.193412		0	5	4	10	275	0.326216
0	5	5	0	4842	0.149796		0	5	5	0	260	0.072768
0	5	5	1	9	0.000278431		0	5	5	1	2	0.000559754
0	5	5	2	2	6.18735e-05		0	5	5	2	0	0
0	5	5	3	2	6.18735e-05		0	5	5	3	0	0
0	5	5	4	5	0.000154684		0	5	5	4	0	0
0	5	5	5	6	0.000185621		0	5	5	5	1	0.000279877
0	5	5	6	8	0.000247494		0	5	5	6	0	0
0	5	5	7	12	0.000371241		0	5	5	7	0	0
0	5	5	8	19	0.000587799		0	5	5	8	3	0.000839631
0	5	5	9	16	0.000494988		0	5	5	9	0	0
0	5	5	10	27403	0.84776		0	5	5	10	3307	0.925553
0	6	0	0	17162	0.846712		0	6	0	0	1737	0.782785
0	6	0	1	0	0		0	6	0	1	0	0
0	6	0	2	0	0		0	6	0	2	0	0
0	6	0	3	0	0		0	6	0	3	0	0
0	6	0	4	5	0.000246682		0	6	0	4	0	0
0	6	0	5	5	0.000246682		0	6	0	5	0	0
0	6	0	6	2	9.86729e-05		0	6	0	6	2	0.000901307
0	6	0	7	0	0		0	6	0	7	0	0
0	6	0	8	0	0		0	6	0	8	0	0
0	6	0	9	0	0		0	6	0	9	0	0
0	6	0	10	3095	0.152696		0	6	0	10	480	0.216314
0	6	1	0	16835	0.829433		0	6	1	0	937	0.783445
0	6	1	1	3	0.000147805		0	6	1	1	0	0
0	6	1	2	16	0.000788294		0	6	1	2	2	0.00167224
0	6	1	3	8	0.000394147		0	6	1	3	1	0.00083612
0	6	1	4	8	0.000394147		0	6	1	4	0	0
0	6	1	5	12	0.00059122		0	6	1	5	0	0
0	6	1	6	16	0.000788294		0	6	1	6	3	0.00250836
0	6	1	7	9	0.000443415		0	6	1	7	1	0.00083612
0	6	1	8	9	0.000443415		0	6	1	8	0	0
0	6	1	9	0	0		0	6	1	9	0	0
0	6	1	10	3381	0.166576		0	6	1	10	252	0.210702
0	6	2	0	13706	0.830818		0	6	2	0	725	0.777063
0	6	2	1	14	0.000848639		0	6	2	1	4	0.00428725
0	6	2	2	6	0.000363702		0	6	2	2	1	0.00107181
0	6	2	3	11	0.000666788		0	6	2	3	0	0
0	6	2	4	9	0.000545554		0	6	2	4	4	0.00428725
0	6	2	5	8	0.000484937		0	6	2	5	0	0
0	6	2	6	8	0.000484937		0	6	2	6	1	0.00107181
0	6	2	7	19	0.00115172		0	6	2	7	0	0
0	6	2	8	26	0.00157604		0	6	2	8	1	0.00107181
0	6	2	9	0	0		0	6	2	9	0	0
0	6	2	10	2690	0.16306		0	6	2	10	197	0.211147
0	6	3	0	11138	0.815015		0	6	3	0	616	0.729858
0	6	3	1	12	0.000878092		0	6	3	1	2	0.00236967
0	6	3	2	14	0.00102444		0	6	3	2	0	0
0	6	3	3	15	0.00109761		0	6	3	3	2	0.00236967
0	6	3	4	13	0.000951266		0	6	3	4	1	0.00118483
0	6	3	5	16	0.00117079		0	6	3	5	0	0
0	6	3	6	13	0.000951266		0	6	3	6	1	0.00118483
0	6	3	7	19	0.00139031		0	6	3	7	1	0.00118483
0	6	3	8	16	0.00117079		0	6	3	8	0	0
0	6	3	9	10	0.000731743		0	6	3	9	1	0.00118483
0	6	3	10	2400	0.175618		0	6	3	10	220	0.260664
0	6	4	0	9546	0.823215		0	6	4	0	559	0.716667
0	6	4	1	8	0.000689893		0	6	4	1	0	0
0	6	4	2	11	0.000948603		0	6	4	2	0	0
0	6	4	3	8	0.000689893		0	6	4	3	0	0
0	6	4	4	10	0.000862366		0	6	4	4	1	0.00128205
0	6	4	5	15	0.00129355		0	6	4	5	1	0.00128205
0	6	4	6	18	0.00155226		0	6	4	6	1	0.00128205
0	6	4	7	13	0.00112108		0	6	4	7	0	0
0	6	4	8	9	0.00077613		0	6	4	8	0	0
0	6	4	9	15	0.00129355		0	6	4	9	1	0.00128205
0	6	4	10	1943	0.167558		0	6	4	10	217	0.278205
0	6	5	0	8195	0.785187		0	6	5	0	468	0.648199
0	6	5	1	13	0.00124557		0	6	5	1	0	0
0	6	5	2	8	0.000766504		0	6	5	2	0	0
0	6	5	3	10	0.00095813		0	6	5	3	1	0.00138504
0	6	5	4	11	0.00105394		0	6	5	4	0	0
0	6	5	5	16	0.00153301		0	6	5	5	1	0.00138504
0	6	5	6	14	0.00134138		0	6	5	6	1	0.00138504
0	6	5	7	9	0.000862317		0	6	5	7	2	0.00277008
0	6	5	8	22	0.00210789		0	6	5	8	0	0
0	6	5	9	17	0.00162882		0	6	5	9	0	0
0	6	5	10	2122	0.203315		0	6	5	10	249	0.344875
0	6	6	0	3771	0.133814		0	6	6	0	214	0.0625731
0	6	6	1	6	0.000212909		0	6	6	1	0	0
0	6	6	2	7	0.000248394		0	6	6	2	0	0
0	6	6	3	2	7.09698e-05		0	6	6	3	0	0
0	6	6	4	7	0.000248394		0	6	6	4	0	0
0	6	6	5	8	0.000283879		0	6	6	5	0	0
0	6	6	6	8	0.000283879		0	6	6	6	0	0
0	6	6	7	1	3.54849e-05		0	6	6	7	1	0.000292398
0	6	6	8	10	0.000354849		0	6	6	8	1	0.000292398
0	6	6	9	10	0.000354849		0	6	6	9	1	0.000292398
0	6	6	10	24351	0.864093		0	6	6	10	3203	0.93655
0	7	0	0	14580	0.829587		0	7	0	0	1607	0.767431
0	7	0	1	0	0		0	7	0	1	0	0
0	7	0	2	0	0		0	7	0	2	0	0
0	7	0	3	0	0		0	7	0	3	0	0
0	7	0	4	5	0.000284495		0	7	0	4	0	0
0	7	0	5	8	0.000455192		0	7	0	5	1	0.000477555
0	7	0	6	0	0		0	7	0	6	0	0
0	7	0	7	0	0		0	7	0	7	0	0
0	7	0	8	0	0		0	7	0	8	0	0
0	7	0	9	0	0		0	7	0	9	0	0
0	7	0	10	2982	0.169673		0	7	0	10	486	0.232092
0	7	1	0	14873	0.821168		0	7	1	0	953	0.785008
0	7	1	1	1	5.5212e-05		0	7	1	1	1	0.000823723
0	7	1	2	12	0.000662544		0	7	1	2	1	0.000823723
0	7	1	3	12	0.000662544		0	7	1	3	1	0.000823723
0	7	1	4	1	5.5212e-05		0	7	1	4	0	0
0	7	1	5	2	0.000110424		0	7	1	5	0	0
0	7	1	6	11	0.000607332		0	7	1	6	0	0
0	7	1	7	9	0.000496908		0	7	1	7	0	0
0	7	1	8	12	0.000662544		0	7	1	8	0	0
0	7	1	9	0	0		0	7	1	9	0	0
0	7	1	10	3179	0.175519		0	7	1	10	258	0.212521
0	7	2	0	11611	0.820102		0	7	2	0	700	0.763359
0	7	2	1	10	0.000706315		0	7	2	1	0	0
0	7	2	2	6	0.000423789		0	7	2	2	1	0.00109051
0	7	2	3	5	0.000353157		0	7	2	3	1	0.00109051
0	7	2	4	11	0.000776946		0	7	2	4	0	0
0	7	2	5	14	0.00098884		0	7	2	5	3	0.00327154
0	7	2	6	5	0.000353157		0	7	2	6	1	0.00109051
0	7	2	7	8	0.000565052		0	7	2	7	0	0
0	7	2	8	8	0.000565052		0	7	2	8	2	0.00218103
0	7	2	9	0	0		0	7	2	9	0	0
0	7	2	10	2480	0.175166		0	7	2	10	209	0.227917
0	7	3	0	9734	0.803599		0	7	3	0	567	0.785319
0	7	3	1	9	0.000743003		0	7	3	1	0	0
0	7	3	2	12	0.000990671		0	7	3	2	0	0
0	7	3	3	9	0.000743003		0	7	3	3	1	0.00138504
0	7	3	4	9	0.000743003		0	7	3	4	0	0
0	7	3	5	8	0.000660448		0	7	3	5	0	0
0	7	3	6	9	0.000743003		0	7	3	6	0	0
0	7	3	7	6	0.000495336		0	7	3	7	0	0
0	7	3	8	22	0.00181623		0	7	3	8	2	0.00277008
0	7	3	9	13	0.00107323		0	7	3	9	0	0
0	7	3	10	2282	0.188393		0	7	3	10	152	0.210526
0	7	4	0	8100	0.801028		0	7	4	0	438	0.732441
0	7	4	1	12	0.00118671		0	7	4	1	2	0.00334448
0	7	4	2	8	0.000791139		0	7	4	2	0	0
0	7	4	3	11	0.00108782		0	7	4	3	1	0.00167224
0	7	4	4	9	0.000890032		0	7	4	4	1	0.00167224
0	7	4	5	11	0.00108782		0	7	4	5	2	0.00334448
0	7	4	6	11	0.00108782		0	7	4	6	1	0.00167224
0	7	4	7	6	0.000593354		0	7	4	7	0	0
0	7	4	8	12	0.00118671		0	7	4	8	1	0.00167224
0	7	4	9	15	0.00148339		0	7	4	9	0	0
0	7	4	10	1917	0.189577		0	7	4	10	152	0.254181
0	7	5	0	7326	0.791829		0	7	5	0	388	0.686726
0	7	5	1	11	0.00118893		0	7	5	1	1	0.00176991
0	7	5	2	8	0.000864678		0	7	5	2	0	0
0	7	5	3	7	0.000756593		0	7	5	3	0	0
0	7	5	4	7	0.000756593		0	7	5	4	0	0
0	7	5	5	10	0.00108085		0	7	5	5	0	0
0	7	5	6	14	0.00151319		0	7	5	6	0	0
0	7	5	7	15	0.00162127		0	7	5	7	0	0
0	7	5	8	20	0.00216169		0	7	5	8	2	0.00353982
0	7	5	9	16	0.00172936		0	7	5	9	0	0
0	7	5	10	1818	0.196498		0	7	5	10	174	0.307965
0	7	6	0	6155	0.742103		0	7	6	0	408	0.6
0	7	6	1	13	0.0015674		0	7	6	1	0	0
0	7	6	2	11	0.00132626		0	7	6	2	1	0.00147059
0	7	6	3	10	0.00120569		0	7	6	3	0	0
0	7	6	4	19	0.00229081		0	7	6	4	1	0.00147059
0	7	6	5	14	0.00168797		0	7	6	5	3	0.00441176
0	7	6	6	14	0.00168797		0	7	6	6	0	0
0	7	6	7	12	0.00144683		0	7	6	7	1	0.00147059
0	7	6	8	24	0.00289366		0	7	6	8	2	0.00294118
0	7	6	9	15	0.00180854		0	7	6	9	1	0.00147059
0	7	6	10	2007	0.241982		0	7	6	10	263	0.386765
0	7	7	0	2954	0.120537		0	7	7	0	192	0.0615977
0	7	7	1	5	0.000204023		0	7	7	1	0	0
0	7	7	2	5	0.000204023		0	7	7	2	1	0.000320821
0	7	7	3	6	0.000244828		0	7	7	3	0	0
0	7	7	4	7	0.000285633		0	7	7	4	0	0
0	7	7	5	7	0.000285633		0	7	7	5	0	0
0	7	7	6	8	0.000326437		0	7	7	6	0	0
0	7	7	7	2	8.16093e-05		0	7	7	7	0	0
0	7	7	8	1	4.08047e-05		0	7	7	8	2	0.000641643
0	7	7	9	28	0.00114253		0	7	7	9	3	0.000962464
0	7	7	10	21484	0.876647		0	7	7	10	2919	0.936477
0	8	0	0	12667	0.805738		0	8	0	0	1509	0.763664
0	8	0	1	0	0		0	8	0	1	0	0
0	8	0	2	0	0		0	8	0	2	0	0
0	8	0	3	0	0		0	8	0	3	1	0.000506073
0	8	0	4	6	0.000381655		0	8	0	4	0	0
0	8	0	5	11	0.000699701		0	8	0	5	0	0
0	8	0	6	2	0.000127218		0	8	0	6	0	0
0	8	0	7	0	0		0	8	0	7	0	0
0	8	0	8	0	0		0	8	0	8	0	0
0	8	0	9	0	0		0	8	0	9	0	0
0	8	0	10	3035	0.193054		0	8	0	10	466	0.23583
0	8	1	0	13193	0.803912		0	8	1	0	881	0.77213
0	8	1	1	2	0.00012187		0	8	1	1	0	0
0	8	1	2	15	0.000914021		0	8	1	2	0	0
0	8	1	3	8	0.000487478		0	8	1	3	1	0.000876424
0	8	1	4	3	0.000182804		0	8	1	4	0	0
0	8	1	5	2	0.00012187		0	8	1	5	1	0.000876424
0	8	1	6	16	0.000974956		0	8	1	6	0	0
0	8	1	7	9	0.000548413		0	8	1	7	2	0.00175285
0	8	1	8	5	0.000304674		0	8	1	8	0	0
0	8	1	9	0	0		0	8	1	9	0	0
0	8	1	10	3158	0.192432		0	8	1	10	256	0.224365
0	8	2	0	10621	0.801948		0	8	2	0	665	0.733186
0	8	2	1	13	0.000981577		0	8	2	1	3	0.00330761
0	8	2	2	8	0.000604047		0	8	2	2	1	0.00110254
0	8	2	3	7	0.000528541		0	8	2	3	3	0.00330761
0	8	2	4	3	0.000226518		0	8	2	4	0	0
0	8	2	5	4	0.000302024		0	8	2	5	0	0
0	8	2	6	14	0.00105708		0	8	2	6	0	0
0	8	2	7	10	0.000755059		0	8	2	7	0	0
0	8	2	8	19	0.00143461		0	8	2	8	1	0.00110254
0	8	2	9	0	0		0	8	2	9	0	0
0	8	2	10	2545	0.192162		0	8	2	10	234	0.257993
0	8	3	0	8453	0.79		0	8	3	0	529	0.756795
0	8	3	1	6	0.000560748		0	8	3	1	1	0.00143062
0	8	3	2	7	0.000654206		0	8	3	2	0	0
0	8	3	3	8	0.000747664		0	8	3	3	1	0.00143062
0	8	3	4	8	0.000747664		0	8	3	4	1	0.00143062
0	8	3	5	5	0.00046729		0	8	3	5	0	0
0	8	3	6	12	0.0011215		0	8	3	6	0	0
0	8	3	7	11	0.00102804		0	8	3	7	0	0
0	8	3	8	8	0.000747664		0	8	3	8	2	0.00286123
0	8	3	9	11	0.00102804		0	8	3	9	0	0
0	8	3	10	2171	0.202897		0	8	3	10	165	0.236052
0	8	4	0	7397	0.786413		0	8	4	0	468	0.696429
0	8	4	1	5	0.000531576		0	8	4	1	2	0.00297619
0	8	4	2	5	0.000531576		0	8	4	2	1	0.0014881
0	8	4	3	12	0.00127578		0	8	4	3	1	0.0014881
0	8	4	4	7	0.000744206		0	8	4	4	3	0.00446429
0	8	4	5	12	0.00127578		0	8	4	5	0	0
0	8	4	6	10	0.00106315		0	8	4	6	1	0.0014881
0	8	4	7	15	0.00159473		0	8	4	7	0	0
0	8	4	8	12	0.00127578		0	8	4	8	1	0.0014881
0	8	4	9	11	0.00116947		0	8	4	9	4	0.00595238
0	8	4	10	1920	0.204125		0	8	4	10	191	0.284226
0	8	5	0	6604	0.777673		0	8	5	0	384	0.699454
0	8	5	1	12	0.00141309		0	8	5	1	1	0.00182149
0	8	5	2	7	0.000824305		0	8	5	2	1	0.00182149
0	8	5	3	11	0.00129534		0	8	5	3	0	0
0	8	5	4	9	0.00105982		0	8	5	4	0	0
0	8	5	5	7	0.000824305		0	8	5	5	1	0.00182149
0	8	5	6	8	0.000942063		0	8	5	6	0	0
0	8	5	7	13	0.00153085		0	8	5	7	0	0
0	8	5	8	13	0.00153085		0	8	5	8	0	0
0	8	5	9	17	0.00200188		0	8	5	9	0	0
0	8	5	10	1791	0.210904		0	8	5	10	162	0.295082
0	8	6	0	5687	0.759279		0	8	6	0	414	0.717504
0	8	6	1	12	0.00160214		0	8	6	1	2	0.0034662
0	8	6	2	14	0.00186916		0	8	6	2	0	0
0	8	6	3	8	0.00106809		0	8	6	3	1	0.0017331
0	8	6	4	12	0.00160214		0	8	6	4	1	0.0017331
0	8	6	5	19	0.00253672		0	8	6	5	0	0
0	8	6	6	6	0.000801068		0	8	6	6	0	0
0	8	6	7	21	0.00280374		0	8	6	7	0	0
0	8	6	8	18	0.0024032		0	8	6	8	0	0
0	8	6	9	12	0.00160214		0	8	6	9	0	0
0	8	6	10	1681	0.224433		0	8	6	10	159	0.275563
0	8	7	0	4958	0.725809		0	8	7	0	397	0.598793
0	8	7	1	9	0.00131752		0	8	7	1	0	0
0	8	7	2	13	0.00190309		0	8	7	2	0	0
0	8	7	3	7	0.00102474		0	8	7	3	2	0.00301659
0	8	7	4	13	0.00190309		0	8	7	4	3	0.00452489
0	8	7	5	14	0.00204948		0	8	7	5	1	0.0015083
0	8	7	6	11	0.00161031		0	8	7	6	0	0
0	8	7	7	17	0.00248865		0	8	7	7	0	0
0	8	7	8	28	0.00409896		0	8	7	8	0	0
0	8	7	9	41	0.00600205		0	8	7	9	2	0.00301659
0	8	7	10	1720	0.251793		0	8	7	10	258	0.38914
0	8	8	0	2287	0.103204		0	8	8	0	159	0.0541738
0	8	8	1	5	0.000225632		0	8	8	1	0	0
0	8	8	2	8	0.000361011		0	8	8	2	0	0
0	8	8	3	5	0.000225632		0	8	8	3	1	0.000340716
0	8	8	4	15	0.000676895		0	8	8	4	1	0.000340716
0	8	8	5	4	0.000180505		0	8	8	5	1	0.000340716
0	8	8	6	4	0.000180505		0	8	8	6	0	0
0	8	8	7	6	0.000270758		0	8	8	7	2	0.000681431
0	8	8	8	5	0.000225632		0	8	8	8	0	0
0	8	8	9	23	0.00103791		0	8	8	9	3	0.00102215
0	8	8	10	19798	0.893412		0	8	8	10	2768	0.943101
0	9	0	0	10629	0.794632		0	9	0	0	1243	0.732038
0	9	0	1	0	0		0	9	0	1	0	0
0	9	0	2	0	0		0	9	0	2	0	0
0	9	0	3	0	0		0	9	0	3	0	0
0	9	0	4	2	0.000149521		0	9	0	4	0	0
0	9	0	5	5	0.000373804		0	9	0	5	1	0.000588928
0	9	0	6	0	0		0	9	0	6	1	0.000588928
0	9	0	7	0	0		0	9	0	7	0	0
0	9	0	8	0	0		0	9	0	8	0	0
0	9	0	9	0	0		0	9	0	9	0	0
0	9	0	10	2740	0.204844		0	9	0	10	453	0.266784
0	9	1	0	11652	0.792869		0	9	1	0	717	0.709901
0	9	1	1	2	0.000136092		0	9	1	1	1	0.000990099
0	9	1	2	3	0.000204137		0	9	1	2	0	0
0	9	1	3	7	0.00047632		0	9	1	3	1	0.000990099
0	9	1	4	2	0.000136092		0	9	1	4	0	0
0	9	1	5	4	0.000272183		0	9	1	5	0	0
0	9	1	6	11	0.000748503		0	9	1	6	0	0
0	9	1	7	7	0.00047632		0	9	1	7	1	0.000990099
0	9	1	8	2	0.000136092		0	9	1	8	2	0.0019802
0	9	1	9	0	0		0	9	1	9	0	0
0	9	1	10	3006	0.204545		0	9	1	10	288	0.285149
0	9	2	0	8926	0.794906		0	9	2	0	590	0.718636
0	9	2	1	8	0.000712441		0	9	2	1	0	0
0	9	2	2	8	0.000712441		0	9	2	2	1	0.00121803
0	9	2	3	6	0.000534331		0	9	2	3	0	0
0	9	2	4	7	0.000623386		0	9	2	4	0	0
0	9	2	5	4	0.00035622		0	9	2	5	0	0
0	9	2	6	4	0.00035622		0	9	2	6	0	0
0	9	2	7	4	0.00035622		0	9	2	7	0	0
0	9	2	8	12	0.00106866		0	9	2	8	1	0.00121803
0	9	2	9	0	0		0	9	2	9	0	0
0	9	2	10	2250	0.200374		0	9	2	10	229	0.278928
0	9	3	0	7506	0.788694		0	9	3	0	492	0.707914
0	9	3	1	9	0.000945676		0	9	3	1	0	0
0	9	3	2	6	0.000630451		0	9	3	2	0	0
0	9	3	3	4	0.0004203		0	9	3	3	2	0.0028777
0	9	3	4	7	0.000735526		0	9	3	4	0	0
0	9	3	5	12	0.0012609		0	9	3	5	1	0.00143885
0	9	3	6	8	0.000840601		0	9	3	6	1	0.00143885
0	9	3	7	12	0.0012609		0	9	3	7	0	0
0	9	3	8	8	0.000840601		0	9	3	8	1	0.00143885
0	9	3	9	7	0.000735526		0	9	3	9	1	0.00143885
0	9	3	10	1938	0.203636		0	9	3	10	197	0.283453
0	9	4	0	6337	0.781381		0	9	4	0	446	0.720517
0	9	4	1	9	0.00110974		0	9	4	1	1	0.00161551
0	9	4	2	6	0.000739827		0	9	4	2	1	0.00161551
0	9	4	3	5	0.000616523		0	9	4	3	0	0
0	9	4	4	15	0.00184957		0	9	4	4	1	0.00161551
0	9	4	5	7	0.000863132		0	9	4	5	0	0
0	9	4	6	9	0.00110974		0	9	4	6	0	0
0	9	4	7	12	0.00147965		0	9	4	7	0	0
0	9	4	8	7	0.000863132		0	9	4	8	0	0
0	9	4	9	19	0.00234279		0	9	4	9	0	0
0	9	4	10	1684	0.207645		0	9	4	10	170	0.274637
0	9	5	0	5523	0.766338		0	9	5	0	355	0.701581
0	9	5	1	6	0.000832524		0	9	5	1	0	0
0	9	5	2	5	0.00069377		0	9	5	2	0	0
0	9	5	3	8	0.00111003		0	9	5	3	2	0.00395257
0	9	5	4	10	0.00138754		0	9	5	4	0	0
0	9	5	5	6	0.000832524		0	9	5	5	0	0
0	9	5	6	11	0.00152629		0	9	5	6	0	0
0	9	5	7	12	0.00166505		0	9	5	7	3	0.00592885
0	9	5	8	21	0.00291383		0	9	5	8	1	0.00197628
0	9	5	9	5	0.00069377		0	9	5	9	1	0.00197628
0	9	5	10	1600	0.222006		0	9	5	10	144	0.284585
0	9	6	0	5155	0.764043		0	9	6	0	320	0.668058
0	9	6	1	10	0.00148214		0	9	6	1	0	0
0	9	6	2	9	0.00133393		0	9	6	2	1	0.00208768
0	9	6	3	7	0.0010375		0	9	6	3	1	0.00208768
0	9	6	4	16	0.00237142		0	9	6	4	0	0
0	9	6	5	9	0.00133393		0	9	6	5	1	0.00208768
0	9	6	6	10	0.00148214		0	9	6	6	0	0
0	9	6	7	20	0.00296428		0	9	6	7	2	0.00417537
0	9	6	8	10	0.00148214		0	9	6	8	2	0.00417537
0	9	6	9	7	0.0010375		0	9	6	9	2	0.00417537
0	9	6	10	1494	0.221432		0	9	6	10	150	0.313152
0	9	7	0	4335	0.742931		0	9	7	0	333	0.680982
0	9	7	1	9	0.00154242		0	9	7	1	1	0.00204499
0	9	7	2	5	0.000856898		0	9	7	2	0	0
0	9	7	3	5	0.000856898		0	9	7	3	1	0.00204499
0	9	7	4	8	0.00137104		0	9	7	4	0	0
0	9	7	5	12	0.00205656		0	9	7	5	0	0
0	9	7	6	10	0.0017138		0	9	7	6	0	0
0	9	7	7	7	0.00119966		0	9	7	7	1	0.00204499
0	9	7	8	15	0.00257069		0	9	7	8	0	0
0	9	7	9	23	0.00394173		0	9	7	9	0	0
0	9	7	10	1406	0.24096		0	9	7	10	153	0.312883
0	9	8	0	3769	0.70607		0	9	8	0	302	0.547101
0	9	8	1	16	0.00299738		0	9	8	1	1	0.00181159
0	9	8	2	6	0.00112402		0	9	8	2	0	0
0	9	8	3	11	0.0020607		0	9	8	3	1	0.00181159
0	9	8	4	16	0.00299738		0	9	8	4	0	0
0	9	8	5	9	0.00168602		0	9	8	5	0	0
0	9	8	6	5	0.00093668		0	9	8	6	0	0
0	9	8	7	18	0.00337205		0	9	8	7	0	0
0	9	8	8	20	0.00374672		0	9	8	8	2	0.00362319
0	9	8	9	27	0.00505807		0	9	8	9	2	0.00362319
0	9	8	10	1441	0.269951		0	9	8	10	244	0.442029
0	9	9	0	1855	0.097647		0	9	9	0	138	0.0509413
0	9	9	1	3	0.00015792		0	9	9	1	0	0
0	9	9	2	3	0.00015792		0	9	9	2	0	0
0	9	9	3	2	0.00010528		0	9	9	3	0	0
0	9	9	4	5	0.000263199		0	9	9	4	0	0
0	9	9	5	6	0.000315839		0	9	9	5	0	0
0	9	9	6	8	0.000421119		0	9	9	6	1	0.00036914
0	9	9	7	10	0.000526399		0	9	9	7	0	0
0	9	9	8	6	0.000315839		0	9	9	8	1	0.00036914
0	9	9	9	16	0.000842238		0	9	9	9	4	0.00147656
0	9	9	10	17083	0.899247		0	9	9	10	2565	0.946844
0	10	0	0	10164	0.774695		0	10	0	0	1245	0.705782
0	10	0	1	0	0		0	10	0	1	0	0
0	10	0	2	0	0		0	10	0	2	0	0
0	10	0	3	0	0		0	10	0	3	1	0.000566893
0	10	0	4	2	0.000152439		0	10	0	4	0	0
0	10	0	5	4	0.000304878		0	10	0	5	0	0
0	10	0	6	0	0		0	10	0	6	0	0
0	10	0	7	0	0		0	10	0	7	0	0
0	10	0	8	0	0		0	10	0	8	0	0
0	10	0	9	0	0		0	10	0	9	0	0
0	10	0	10	2950	0.224848		0	10	0	10	518	0.293651
0	10	1	0	11270	0.781553		0	10	1	0	701	0.679264
0	10	1	1	3	0.000208044		0	10	1	1	0	0
0	10	1	2	7	0.000485437		0	10	1	2	2	0.00193798
0	10	1	3	8	0.000554785		0	10	1	3	0	0
0	10	1	4	7	0.000485437		0	10	1	4	0	0
0	10	1	5	2	0.000138696		0	10	1	5	0	0
0	10	1	6	13	0.000901526		0	10	1	6	0	0
0	10	1	7	8	0.000554785		0	10	1	7	1	0.000968992
0	10	1	8	5	0.000346741		0	10	1	8	2	0.00193798
0	10	1	9	0	0		0	10	1	9	0	0
0	10	1	10	3097	0.214771		0	10	1	10	326	0.315891
0	10	2	0	8770	0.776312		0	10	2	0	593	0.714458
0	10	2	1	8	0.000708153		0	10	2	1	1	0.00120482
0	10	2	2	7	0.000619634		0	10	2	2	0	0
0	10	2	3	11	0.00097371		0	10	2	3	1	0.00120482
0	10	2	4	6	0.000531115		0	10	2	4	1	0.00120482
0	10	2	5	7	0.000619634		0	10	2	5	1	0.00120482
0	10	2	6	7	0.000619634		0	10	2	6	0	0
0	10	2	7	7	0.000619634		0	10	2	7	0	0
0	10	2	8	11	0.00097371		0	10	2	8	2	0.00240964
0	10	2	9	0	0		0	10	2	9	0	0
0	10	2	10	2463	0.218022		0	10	2	10	231	0.278313
0	10	3	0	7471	0.770286		0	10	3	0	425	0.673534
0	10	3	1	11	0.00113414		0	10	3	1	0	0
0	10	3	2	9	0.000927931		0	10	3	2	0	0
0	10	3	3	4	0.000412414		0	10	3	3	0	0
0	10	3	4	6	0.000618621		0	10	3	4	0	0
0	10	3	5	11	0.00113414		0	10	3	5	1	0.00158479
0	10	3	6	8	0.000824827		0	10	3	6	0	0
0	10	3	7	4	0.000412414		0	10	3	7	0	0
0	10	3	8	18	0.00185586		0	10	3	8	0	0
0	10	3	9	1	0.000103103		0	10	3	9	0	0
0	10	3	10	2156	0.222291		0	10	3	10	205	0.324881
0	10	4	0	6137	0.759812		0	10	4	0	421	0.71843
0	10	4	1	5	0.000619042		0	10	4	1	1	0.00170648
0	10	4	2	13	0.00160951		0	10	4	2	0	0
0	10	4	3	9	0.00111428		0	10	4	3	0	0
0	10	4	4	4	0.000495233		0	10	4	4	1	0.00170648
0	10	4	5	3	0.000371425		0	10	4	5	0	0
0	10	4	6	13	0.00160951		0	10	4	6	1	0.00170648
0	10	4	7	10	0.00123808		0	10	4	7	1	0.00170648
0	10	4	8	6	0.00074285		0	10	4	8	1	0.00170648
0	10	4	9	6	0.00074285		0	10	4	9	0	0
0	10	4	10	1871	0.231645		0	10	4	10	160	0.273038
0	10	5	0	5669	0.75992		0	10	5	0	310	0.679825
0	10	5	1	6	0.000804289		0	10	5	1	1	0.00219298
0	10	5	2	8	0.00107239		0	10	5	2	0	0
0	10	5	3	13	0.00174263		0	10	5	3	1	0.00219298
0	10	5	4	7	0.000938338		0	10	5	4	0	0
0	10	5	5	11	0.00147453		0	10	5	5	1	0.00219298
0	10	5	6	7	0.000938338		0	10	5	6	0	0
0	10	5	7	9	0.00120643		0	10	5	7	0	0
0	10	5	8	8	0.00107239		0	10	5	8	1	0.00219298
0	10	5	9	12	0.00160858		0	10	5	9	1	0.00219298
0	10	5	10	1710	0.229223		0	10	5	10	141	0.309211
0	10	6	0	4990	0.744332		0	10	6	0	327	0.650099
0	10	6	1	9	0.00134248		0	10	6	1	1	0.00198807
0	10	6	2	10	0.00149165		0	10	6	2	1	0.00198807
0	10	6	3	7	0.00104415		0	10	6	3	0	0
0	10	6	4	3	0.000447494		0	10	6	4	0	0
0	10	6	5	12	0.00178998		0	10	6	5	0	0
0	10	6	6	14	0.00208831		0	10	6	6	0	0
0	10	6	7	10	0.00149165		0	10	6	7	1	0.00198807
0	10	6	8	20	0.00298329		0	10	6	8	1	0.00198807
0	10	6	9	13	0.00193914		0	10	6	9	2	0.00397614
0	10	6	10	1616	0.24105		0	10	6	10	170	0.337972
0	10	7	0	4420	0.729855		0	10	7	0	311	0.651992
0	10	7	1	10	0.00165125		0	10	7	1	0	0
0	10	7	2	13	0.00214663		0	10	7	2	0	0
0	10	7	3	6	0.000990753		0	10	7	3	0	0
0	10	7	4	8	0.001321		0	10	7	4	2	0.00419287
0	10	7	5	12	0.00198151		0	10	7	5	0	0
0	10	7	6	13	0.00214663		0	10	7	6	1	0.00209644
0	10	7	7	13	0.00214663		0	10	7	7	0	0
0	10	7	8	15	0.00247688		0	10	7	8	0	0
0	10	7	9	24	0.00396301		0	10	7	9	0	0
0	10	7	10	1522	0.251321		0	10	7	10	163	0.341719
0	10	8	0	4003	0.732345		0	10	8	0	288	0.578313
0	10	8	1	11	0.00201244		0	10	8	1	2	0.00401606
0	10	8	2	13	0.00237834		0	10	8	2	0	0
0	10	8	3	14	0.00256129		0	10	8	3	0	0
0	10	8	4	14	0.00256129		0	10	8	4	0	0
0	10	8	5	9	0.00164654		0	10	8	5	1	0.00200803
0	10	8	6	9	0.00164654		0	10	8	6	0	0
0	10	8	7	10	0.00182949		0	10	8	7	0	0
0	10	8	8	15	0.00274424		0	10	8	8	1	0.00200803
0	10	8	9	25	0.00457373		0	10	8	9	5	0.0100402
0	10	8	10	1343	0.245701		0	10	8	10	201	0.403614
0	10	9	0	3580	0.701136		0	10	9	0	252	0.563758
0	10	9	1	7	0.00137094		0	10	9	1	1	0.00223714
0	10	9	2	8	0.00156678		0	10	9	2	0	0
0	10	9	3	7	0.00137094		0	10	9	3	0	0
0	10	9	4	14	0.00274187		0	10	9	4	0	0
0	10	9	5	16	0.00313357		0	10	9	5	0	0
0	10	9	6	18	0.00352526		0	10	9	6	1	0.00223714
0	10	9	7	16	0.00313357		0	10	9	7	1	0.00223714
0	10	9	8	21	0.00411281		0	10	9	8	1	0.00223714
0	10	9	9	18	0.00352526		0	10	9	9	3	0.00671141
0	10	9	10	1401	0.274383		0	10	9	10	188	0.420582
0	10	10	0	1832	0.0952975		0	10	10	0	160	0.0578871
0	10	10	1	5	0.000260092		0	10	10	1	1	0.000361794
0	10	10	2	9	0.000468165		0	10	10	2	0	0
0	10	10	3	4	0.000208073		0	10	10	3	2	0.000723589
0	10	10	4	8	0.000416147		0	10	10	4	0	0
0	10	10	5	2	0.000104037		0	10	10	5	0	0
0	10	10	6	5	0.000260092		0	10	10	6	0	0
0	10	10	7	10	0.000520183		0	10	10	7	2	0.000723589
0	10	10	8	6	0.00031211		0	10	10	8	1	0.000361794
0	10	10	9	17	0.000884311		0	10	10	9	3	0.00108538
0	10	10	10	17326	0.901269		0	10	10	10	2595	0.938857
0	11	0	0	8547	0.767029		0	11	0	0	1145	0.679929
0	11	0	1	0	0		0	11	0	1	0	0
0	11	0	2	0	0		0	11	0	2	0	0
0	11	0	3	0	0		0	11	0	3	0	0
0	11	0	4	1	8.97424e-05		0	11	0	4	0	0
0	11	0	5	4	0.00035897		0	11	0	5	0	0
0	11	0	6	0	0		0	11	0	6	0	0
0	11	0	7	0	0		0	11	0	7	0	0
0	11	0	8	0	0		0	11	0	8	0	0
0	11	0	9	0	0		0	11	0	9	0	0
0	11	0	10	2591	0.232523		0	11	0	10	539	0.320071
0	11	1	0	9980	0.768342		0	11	1	0	680	0.685484
0	11	1	1	2	0.000153976		0	11	1	1	0	0
0	11	1	2	7	0.000538918		0	11	1	2	0	0
0	11	1	3	6	0.000461929		0	11	1	3	0	0
0	11	1	4	10	0.000769882		0	11	1	4	0	0
0	11	1	5	5	0.000384941		0	11	1	5	0	0
0	11	1	6	7	0.000538918		0	11	1	6	0	0
0	11	1	7	9	0.000692894		0	11	1	7	2	0.00201613
0	11	1	8	0	0		0	11	1	8	1	0.00100806
0	11	1	9	0	0		0	11	1	9	0	0
0	11	1	10	2963	0.228116		0	11	1	10	309	0.311492
0	11	2	0	7649	0.75419		0	11	2	0	452	0.666667
0	11	2	1	9	0.000887399		0	11	2	1	2	0.00294985
0	11	2	2	5	0.000492999		0	11	2	2	0	0
0	11	2	3	6	0.000591599		0	11	2	3	1	0.00147493
0	11	2	4	1	9.85999e-05		0	11	2	4	0	0
0	11	2	5	10	0.000985999		0	11	2	5	0	0
0	11	2	6	5	0.000492999		0	11	2	6	0	0
0	11	2	7	3	0.0002958		0	11	2	7	1	0.00147493
0	11	2	8	8	0.000788799		0	11	2	8	2	0.00294985
0	11	2	9	0	0		0	11	2	9	0	0
0	11	2	10	2446	0.241175		0	11	2	10	220	0.324484
0	11	3	0	6383	0.750853		0	11	3	0	417	0.658768
0	11	3	1	6	0.000705799		0	11	3	1	0	0
0	11	3	2	7	0.000823432		0	11	3	2	0	0
0	11	3	3	5	0.000588166		0	11	3	3	0	0
0	11	3	4	5	0.000588166		0	11	3	4	1	0.00157978
0	11	3	5	9	0.0010587		0	11	3	5	0	0
0	11	3	6	14	0.00164687		0	11	3	6	0	0
0	11	3	7	7	0.000823432		0	11	3	7	1	0.00157978
0	11	3	8	5	0.000588166		0	11	3	8	0	0
0	11	3	9	0	0		0	11	3	9	1	0.00157978
0	11	3	10	2060	0.242324		0	11	3	10	213	0.336493
0	11	4	0	5468	0.748631		0	11	4	0	358	0.70334
0	11	4	1	8	0.00109529		0	11	4	1	0	0
0	11	4	2	4	0.000547645		0	11	4	2	2	0.00392927
0	11	4	3	6	0.000821468		0	11	4	3	0	0
0	11	4	4	10	0.00136911		0	11	4	4	0	0
0	11	4	5	13	0.00177985		0	11	4	5	0	0
0	11	4	6	10	0.00136911		0	11	4	6	1	0.00196464
0	11	4	7	11	0.00150602		0	11	4	7	0	0
0	11	4	8	10	0.00136911		0	11	4	8	1	0.00196464
0	11	4	9	17	0.00232749		0	11	4	9	0	0
0	11	4	10	1747	0.239184		0	11	4	10	147	0.288802
0	11	5	0	5062	0.750148		0	11	5	0	316	0.643585
0	11	5	1	8	0.00118554		0	11	5	1	2	0.00407332
0	11	5	2	9	0.00133373		0	11	5	2	1	0.00203666
0	11	5	3	12	0.0017783		0	11	5	3	0	0
0	11	5	4	9	0.00133373		0	11	5	4	1	0.00203666
0	11	5	5	10	0.00148192		0	11	5	5	0	0
0	11	5	6	11	0.00163011		0	11	5	6	0	0
0	11	5	7	9	0.00133373		0	11	5	7	0	0
0	11	5	8	13	0.0019265		0	11	5	8	0	0
0	11	5	9	6	0.000889152		0	11	5	9	0	0
0	11	5	10	1599	0.236959		0	11	5	10	171	0.348269
0	11	6	0	4150	0.731406		0	11	6	0	263	0.579295
0	11	6	1	7	0.0012337		0	11	6	1	0	0
0	11	6	2	10	0.00176243		0	11	6	2	1	0.00220264
0	11	6	3	5	0.000881212		0	11	6	3	1	0.00220264
0	11	6	4	7	0.0012337		0	11	6	4	2	0.00440529
0	11	6	5	9	0.00158618		0	11	6	5	0	0
0	11	6	6	6	0.00105746		0	11	6	6	0	0
0	11	6	7	11	0.00193867		0	11	6	7	2	0.00440529
0	11	6	8	12	0.00211491		0	11	6	8	0	0
0	11	6	9	9	0.00158618		0	11	6	9	0	0
0	11	6	10	1448	0.255199		0	11	6	10	185	0.407489
0	11	7	0	3893	0.726984		0	11	7	0	305	0.653105
0	11	7	1	3	0.000560224		0	11	7	1	0	0
0	11	7	2	12	0.0022409		0	11	7	2	0	0
0	11	7	3	12	0.0022409		0	11	7	3	0	0
0	11	7	4	7	0.00130719		0	11	7	4	0	0
0	11	7	5	6	0.00112045		0	11	7	5	1	0.00214133
0	11	7	6	8	0.00149393		0	11	7	6	0	0
0	11	7	7	12	0.0022409		0	11	7	7	0	0
0	11	7	8	16	0.00298786		0	11	7	8	1	0.00214133
0	11	7	9	16	0.00298786		0	11	7	9	1	0.00214133
0	11	7	10	1370	0.255836		0	11	7	10	159	0.340471
0	11	8	0	3521	0.714924		0	11	8	0	282	0.689487
0	11	8	1	9	0.00182741		0	11	8	1	3	0.00733496
0	11	8	2	10	0.00203046		0	11	8	2	0	0
0	11	8	3	9	0.00182741		0	11	8	3	2	0.00488998
0	11	8	4	8	0.00162437		0	11	8	4	0	0
0	11	8	5	7	0.00142132		0	11	8	5	1	0.00244499
0	11	8	6	13	0.00263959		0	11	8	6	2	0.00488998
0	11	8	7	17	0.00345178		0	11	8	7	1	0.00244499
0	11	8	8	9	0.00182741		0	11	8	8	1	0.00244499
0	11	8	9	14	0.00284264		0	11	8	9	5	0.0122249
0	11	8	10	1308	0.265584		0	11	8	10	112	0.273839
0	11	9	0	3064	0.705016		0	11	9	0	222	0.601626
0	11	9	1	6	0.00138058		0	11	9	1	2	0.00542005
0	11	9	2	7	0.00161068		0	11	9	2	0	0
0	11	9	3	6	0.00138058		0	11	9	3	0	0
0	11	9	4	6	0.00138058		0	11	9	4	0	0
0	11	9	5	5	0.00115048		0	11	9	5	0	0
0	11	9	6	13	0.00299126		0	11	9	6	0	0
0	11	9	7	16	0.00368155		0	11	9	7	0	0
0	11	9	8	12	0.00276116		0	11	9	8	0	0
0	11	9	9	18	0.00414174		0	11	9	9	7	0.0189702
0	11	9	10	1193	0.274505		0	11	9	10	138	0.373984
0	11	10	0	2947	0.669012		0	11	10	0	267	0.528713
0	11	10	1	15	0.00340522		0	11	10	1	1	0.0019802
0	11	10	2	8	0.00181612		0	11	10	2	0	0
0	11	10	3	18	0.00408627		0	11	10	3	0	0
0	11	10	4	12	0.00272418		0	11	10	4	0	0
0	11	10	5	8	0.00181612		0	11	10	5	3	0.00594059
0	11	10	6	8	0.00181612		0	11	10	6	2	0.0039604
0	11	10	7	18	0.00408627		0	11	10	7	0	0
0	11	10	8	18	0.00408627		0	11	10	8	3	0.00594059
0	11	10	9	21	0.00476731		0	11	10	9	2	0.0039604
0	11	10	10	1332	0.302384		0	11	10	10	227	0.449505
0	11	11	0	1291	0.0781572		0	11	11	0	100	0.038506
0	11	11	1	8	0.00048432		0	11	11	1	0	0
0	11	11	2	5	0.0003027		0	11	11	2	1	0.00038506
0	11	11	3	7	0.00042378		0	11	11	3	0	0
0	11	11	4	5	0.0003027		0	11	11	4	0	0
0	11	11	5	8	0.00048432		0	11	11	5	0	0
0	11	11	6	6	0.00036324		0	11	11	6	1	0.00038506
0	11	11	7	10	0.0006054		0	11	11	7	0	0
0	11	11	8	12	0.00072648		0	11	11	8	1	0.00038506
0	11	11	9	19	0.00115026		0	11	11	9	0	0
0	11	11	10	15147	0.917		0	11	11	10	2494	0.960339
0	12	0	0	7865	0.744792		0	12	0	0	1132	0.675015
0	12	0	1	0	0		0	12	0	1	0	0
0	12	0	2	0	0		0	12	0	2	0	0
0	12	0	3	0	0		0	12	0	3	1	0.000596303
0	12	0	4	3	0.000284091		0	12	0	4	0	0
0	12	0	5	2	0.000189394		0	12	0	5	0	0
0	12	0	6	0	0		0	12	0	6	0	0
0	12	0	7	0	0		0	12	0	7	0	0
0	12	0	8	0	0		0	12	0	8	0	0
0	12	0	9	0	0		0	12	0	9	0	0
0	12	0	10	2690	0.254735		0	12	0	10	544	0.324389
0	12	1	0	8862	0.740351		0	12	1	0	682	0.67996
0	12	1	1	1	8.35422e-05		0	12	1	1	0	0
0	12	1	2	6	0.000501253		0	12	1	2	0	0
0	12	1	3	9	0.00075188		0	12	1	3	0	0
0	12	1	4	7	0.000584795		0	12	1	4	0	0
0	12	1	5	3	0.000250627		0	12	1	5	0	0
0	12	1	6	13	0.00108605		0	12	1	6	0	0
0	12	1	7	7	0.000584795		0	12	1	7	0	0
0	12	1	8	2	0.000167084		0	12	1	8	2	0.00199402
0	12	1	9	0	0		0	12	1	9	0	0
0	12	1	10	3060	0.255639		0	12	1	10	319	0.318046
0	12	2	0	6819	0.741437		0	12	2	0	482	0.690544
0	12	2	1	13	0.0014135		0	12	2	1	0	0
0	12	2	2	6	0.000652387		0	12	2	2	0	0
0	12	2	3	2	0.000217462		0	12	2	3	2	0.00286533
0	12	2	4	2	0.000217462		0	12	2	4	1	0.00143266
0	12	2	5	6	0.000652387		0	12	2	5	1	0.00143266
0	12	2	6	8	0.000869849		0	12	2	6	0	0
0	12	2	7	6	0.000652387		0	12	2	7	0	0
0	12	2	8	8	0.000869849		0	12	2	8	0	0
0	12	2	9	0	0		0	12	2	9	0	0
0	12	2	10	2327	0.253017		0	12	2	10	212	0.303725
0	12	3	0	5777	0.744843		0	12	3	0	410	0.674342
0	12	3	1	12	0.00154719		0	12	3	1	0	0
0	12	3	2	4	0.00051573		0	12	3	2	0	0
0	12	3	3	8	0.00103146		0	12	3	3	0	0
0	12	3	4	9	0.00116039		0	12	3	4	0	0
0	12	3	5	11	0.00141826		0	12	3	5	0	0
0	12	3	6	7	0.000902527		0	12	3	6	0	0
0	12	3	7	7	0.000902527		0	12	3	7	1	0.00164474
0	12	3	8	7	0.000902527		0	12	3	8	0	0
0	12	3	9	2	0.000257865		0	12	3	9	0	0
0	12	3	10	1912	0.246519		0	12	3	10	197	0.324013
0	12	4	0	5027	0.743419		0	12	4	0	370	0.689013
0	12	4	1	6	0.000887311		0	12	4	1	0	0
0	12	4	2	9	0.00133097		0	12	4	2	0	0
0	12	4	3	12	0.00177462		0	12	4	3	1	0.0018622
0	12	4	4	7	0.0010352		0	12	4	4	0	0
0	12	4	5	3	0.000443656		0	12	4	5	0	0
0	12	4	6	5	0.000739426		0	12	4	6	0	0
0	12	4	7	6	0.000887311		0	12	4	7	0	0
0	12	4	8	7	0.0010352		0	12	4	8	1	0.0018622
0	12	4	9	11	0.00162674		0	12	4	9	1	0.0018622
0	12	4	10	1669	0.24682		0	12	4	10	164	0.3054
0	12	5	0	4651	0.732326		0	12	5	0	310	0.628803
0	12	5	1	8	0.00125964		0	12	5	1	0	0
0	12	5	2	10	0.00157456		0	12	5	2	0	0
0	12	5	3	7	0.00110219		0	12	5	3	0	0
0	12	5	4	4	0.000629822		0	12	5	4	1	0.0020284
0	12	5	5	4	0.000629822		0	12	5	5	1	0.0020284
0	12	5	6	12	0.00188947		0	12	5	6	0	0
0	12	5	7	8	0.00125964		0	12	5	7	1	0.0020284
0	12	5	8	11	0.00173201		0	12	5	8	1	0.0020284
0	12	5	9	11	0.00173201		0	12	5	9	0	0
0	12	5	10	1625	0.255865		0	12	5	10	179	0.363083
0	12	6	0	4050	0.71618		0	12	6	0	304	0.64
0	12	6	1	8	0.00141468		0	12	6	1	1	0.00210526
0	12	6	2	4	0.000707339		0	12	6	2	0	0
0	12	6	3	5	0.000884173		0	12	6	3	0	0
0	12	6	4	9	0.00159151		0	12	6	4	0	0
0	12	6	5	9	0.00159151		0	12	6	5	0	0
0	12	6	6	16	0.00282935		0	12	6	6	0	0
0	12	6	7	5	0.000884173		0	12	6	7	0	0
0	12	6	8	10	0.00176835		0	12	6	8	0	0
0	12	6	9	8	0.00141468		0	12	6	9	1	0.00210526
0	12	6	10	1531	0.270734		0	12	6	10	169	0.355789
0	12	7	0	3510	0.709664		0	12	7	0	298	0.693023
0	12	7	1	7	0.00141529		0	12	7	1	1	0.00232558
0	12	7	2	8	0.00161747		0	12	7	2	0	0
0	12	7	3	10	0.00202184		0	12	7	3	0	0
0	12	7	4	6	0.0012131		0	12	7	4	1	0.00232558
0	12	7	5	3	0.000606551		0	12	7	5	0	0
0	12	7	6	5	0.00101092		0	12	7	6	0	0
0	12	7	7	9	0.00181965		0	12	7	7	1	0.00232558
0	12	7	8	18	0.0036393		0	12	7	8	1	0.00232558
0	12	7	9	16	0.00323494		0	12	7	9	2	0.00465116
0	12	7	10	1354	0.273757		0	12	7	10	126	0.293023
0	12	8	0	3151	0.704449		0	12	8	0	262	0.616471
0	12	8	1	4	0.000894254		0	12	8	1	0	0
0	12	8	2	6	0.00134138		0	12	8	2	1	0.00235294
0	12	8	3	8	0.00178851		0	12	8	3	0	0
0	12	8	4	11	0.0024592		0	12	8	4	0	0
0	12	8	5	10	0.00223564		0	12	8	5	0	0
0	12	8	6	13	0.00290633		0	12	8	6	0	0
0	12	8	7	11	0.0024592		0	12	8	7	0	0
0	12	8	8	10	0.00223564		0	12	8	8	1	0.00235294
0	12	8	9	25	0.00558909		0	12	8	9	0	0
0	12	8	10	1224	0.273642		0	12	8	10	161	0.378824
0	12	9	0	2898	0.706657		0	12	9	0	249	0.650131
0	12	9	1	4	0.000975372		0	12	9	1	0	0
0	12	9	2	8	0.00195074		0	12	9	2	0	0
0	12	9	3	17	0.00414533		0	12	9	3	1	0.00261097
0	12	9	4	11	0.00268227		0	12	9	4	0	0
0	12	9	5	4	0.000975372		0	12	9	5	1	0.00261097
0	12	9	6	10	0.00243843		0	12	9	6	0	0
0	12	9	7	11	0.00268227		0	12	9	7	1	0.00261097
0	12	9	8	13	0.00316996		0	12	9	8	3	0.0078329
0	12	9	9	32	0.00780297		0	12	9	9	0	0
0	12	9	10	1093	0.26652		0	12	9	10	128	0.334204
0	12	10	0	2825	0.688185		0	12	10	0	219	0.548872
0	12	10	1	6	0.00146163		0	12	10	1	0	0
0	12	10	2	18	0.0043849		0	12	10	2	1	0.00250627
0	12	10	3	13	0.00316687		0	12	10	3	1	0.00250627
0	12	10	4	10	0.00243605		0	12	10	4	0	0
0	12	10	5	12	0.00292326		0	12	10	5	2	0.00501253
0	12	10	6	11	0.00267966		0	12	10	6	1	0.00250627
0	12	10	7	14	0.00341048		0	12	10	7	0	0
0	12	10	8	13	0.00316687		0	12	10	8	2	0.00501253
0	12	10	9	19	0.0046285		0	12	10	9	2	0.00501253
0	12	10	10	1164	0.283557		0	12	10	10	171	0.428571
0	12	11	0	2398	0.647933		0	12	11	0	266	0.557652
0	12	11	1	13	0.00351256		0	12	11	1	0	0
0	12	11	2	11	0.00297217		0	12	11	2	0	0
0	12	11	3	8	0.00216158		0	12	11	3	1	0.00209644
0	12	11	4	5	0.00135099		0	12	11	4	0	0
0	12	11	5	6	0.00162118		0	12	11	5	2	0.00419287
0	12	11	6	9	0.00243178		0	12	11	6	0	0
0	12	11	7	15	0.00405296		0	12	11	7	0	0
0	12	11	8	17	0.00459335		0	12	11	8	3	0.00628931
0	12	11	9	29	0.00783572		0	12	11	9	3	0.00628931
0	12	11	10	1190	0.321535		0	12	11	10	202	0.42348
0	12	12	0	1226	0.0796259		0	12	12	0	114	0.0443407
0	12	12	1	10	0.000649477		0	12	12	1	1	0.000388954
0	12	12	2	3	0.000194843		0	12	12	2	0	0
0	12	12	3	2	0.000129895		0	12	12	3	0	0
0	12	12	4	4	0.000259791		0	12	12	4	0	0
0	12	12	5	8	0.000519582		0	12	12	5	0	0
0	12	12	6	9	0.00058453		0	12	12	6	0	0
0	12	12	7	0	0		0	12	12	7	0	0
0	12	12	8	14	0.000909268		0	12	12	8	1	0.000388954
0	12	12	9	23	0.0014938		0	12	12	9	4	0.00155581
0	12	12	10	14098	0.915633		0	12	12	10	2451	0.953326
0	13	0	0	7014	0.715276		0	13	0	0	965	0.653794
0	13	0	1	0	0		0	13	0	1	0	0
0	13	0	2	0	0		0	13	0	2	0	0
0	13	0	3	0	0		0	13	0	3	0	0
0	13	0	4	3	0.000305935		0	13	0	4	0	0
0	13	0	5	5	0.000509892		0	13	0	5	0	0
0	13	0	6	0	0		0	13	0	6	0	0
0	13	0	7	0	0		0	13	0	7	0	0
0	13	0	8	0	0		0	13	0	8	0	0
0	13	0	9	0	0		0	13	0	9	0	0
0	13	0	10	2784	0.283908		0	13	0	10	511	0.346206
0	13	1	0	8134	0.715077		0	13	1	0	593	0.664054
0	13	1	1	0	0		0	13	1	1	0	0
0	13	1	2	8	0.000703297		0	13	1	2	1	0.00111982
0	13	1	3	11	0.000967033		0	13	1	3	0	0
0	13	1	4	2	0.000175824		0	13	1	4	1	0.00111982
0	13	1	5	1	8.79121e-05		0	13	1	5	0	0
0	13	1	6	12	0.00105495		0	13	1	6	0	0
0	13	1	7	15	0.00131868		0	13	1	7	0	0
0	13	1	8	2	0.000175824		0	13	1	8	2	0.00223964
0	13	1	9	0	0		0	13	1	9	0	0
0	13	1	10	3190	0.28044		0	13	1	10	296	0.331467
0	13	2	0	6094	0.706797		0	13	2	0	538	0.69961
0	13	2	1	13	0.00150777		0	13	2	1	1	0.00130039
0	13	2	2	10	0.00115982		0	13	2	2	0	0
0	13	2	3	2	0.000231965		0	13	2	3	0	0
0	13	2	4	7	0.000811877		0	13	2	4	0	0
0	13	2	5	9	0.00104384		0	13	2	5	0	0
0	13	2	6	7	0.000811877		0	13	2	6	0	0
0	13	2	7	5	0.000579912		0	13	2	7	0	0
0	13	2	8	11	0.00127581		0	13	2	8	1	0.00130039
0	13	2	9	0	0		0	13	2	9	0	0
0	13	2	10	2464	0.285781		0	13	2	10	229	0.297789
0	13	3	0	5348	0.725349		0	13	3	0	352	0.610052
0	13	3	1	8	0.00108504		0	13	3	1	1	0.0017331
0	13	3	2	5	0.00067815		0	13	3	2	0	0
0	13	3	3	8	0.00108504		0	13	3	3	1	0.0017331
0	13	3	4	6	0.00081378		0	13	3	4	0	0
0	13	3	5	6	0.00081378		0	13	3	5	0	0
0	13	3	6	12	0.00162756		0	13	3	6	0	0
0	13	3	7	9	0.00122067		0	13	3	7	0	0
0	13	3	8	8	0.00108504		0	13	3	8	1	0.0017331
0	13	3	9	3	0.00040689		0	13	3	9	0	0
0	13	3	10	1960	0.265835		0	13	3	10	222	0.384749
0	13	4	0	4314	0.710591		0	13	4	0	295	0.615866
0	13	4	1	6	0.000988305		0	13	4	1	0	0
0	13	4	2	2	0.000329435		0	13	4	2	1	0.00208768
0	13	4	3	3	0.000494153		0	13	4	3	0	0
0	13	4	4	8	0.00131774		0	13	4	4	1	0.00208768
0	13	4	5	8	0.00131774		0	13	4	5	1	0.00208768
0	13	4	6	13	0.00214133		0	13	4	6	0	0
0	13	4	7	6	0.000988305		0	13	4	7	0	0
0	13	4	8	7	0.00115302		0	13	4	8	1	0.00208768
0	13	4	9	8	0.00131774		0	13	4	9	0	0
0	13	4	10	1696	0.279361		0	13	4	10	180	0.375783
0	13	5	0	4035	0.69858		0	13	5	0	284	0.67619
0	13	5	1	6	0.00103878		0	13	5	1	2	0.0047619
0	13	5	2	7	0.00121191		0	13	5	2	0	0
0	13	5	3	3	0.000519391		0	13	5	3	2	0.0047619
0	13	5	4	2	0.00034626		0	13	5	4	0	0
0	13	5	5	8	0.00138504		0	13	5	5	0	0
0	13	5	6	11	0.00190443		0	13	5	6	0	0
0	13	5	7	9	0.00155817		0	13	5	7	0	0
0	13	5	8	15	0.00259695		0	13	5	8	0	0
0	13	5	9	15	0.00259695		0	13	5	9	0	0
0	13	5	10	1665	0.288262		0	13	5	10	132	0.314286
0	13	6	0	3630	0.691956		0	13	6	0	268	0.618938
0	13	6	1	9	0.00171559		0	13	6	1	1	0.00230947
0	13	6	2	6	0.00114373		0	13	6	2	0	0
0	13	6	3	7	0.00133435		0	13	6	3	2	0.00461894
0	13	6	4	3	0.000571864		0	13	6	4	0	0
0	13	6	5	9	0.00171559		0	13	6	5	0	0
0	13	6	6	9	0.00171559		0	13	6	6	1	0.00230947
0	13	6	7	6	0.00114373		0	13	6	7	2	0.00461894
0	13	6	8	12	0.00228746		0	13	6	8	0	0
0	13	6	9	6	0.00114373		0	13	6	9	0	0
0	13	6	10	1549	0.295273		0	13	6	10	159	0.367206
0	13	7	0	3052	0.672691		0	13	7	0	266	0.661692
0	13	7	1	10	0.0022041		0	13	7	1	0	0
0	13	7	2	8	0.00176328		0	13	7	2	0	0
0	13	7	3	7	0.00154287		0	13	7	3	1	0.00248756
0	13	7	4	8	0.00176328		0	13	7	4	0	0
0	13	7	5	12	0.00264492		0	13	7	5	0	0
0	13	7	6	14	0.00308574		0	13	7	6	0	0
0	13	7	7	8	0.00176328		0	13	7	7	0	0
0	13	7	8	12	0.00264492		0	13	7	8	2	0.00497512
0	13	7	9	10	0.0022041		0	13	7	9	0	0
0	13	7	10	1396	0.307692		0	13	7	10	133	0.330846
0	13	8	0	2948	0.676923		0	13	8	0	261	0.627404
0	13	8	1	8	0.00183697		0	13	8	1	2	0.00480769
0	13	8	2	6	0.00137773		0	13	8	2	1	0.00240385
0	13	8	3	9	0.00206659		0	13	8	3	1	0.00240385
0	13	8	4	7	0.00160735		0	13	8	4	0	0
0	13	8	5	4	0.000918484		0	13	8	5	0	0
0	13	8	6	8	0.00183697		0	13	8	6	1	0.00240385
0	13	8	7	10	0.00229621		0	13	8	7	0	0
0	13	8	8	15	0.00344432		0	13	8	8	2	0.00480769
0	13	8	9	18	0.00413318		0	13	8	9	3	0.00721154
0	13	8	10	1322	0.303559		0	13	8	10	145	0.348558
0	13	9	0	2533	0.675287		0	13	9	0	222	0.606557
0	13	9	1	7	0.00186617		0	13	9	1	1	0.00273224
0	13	9	2	8	0.00213276		0	13	9	2	1	0.00273224
0	13	9	3	4	0.00106638		0	13	9	3	1	0.00273224
0	13	9	4	12	0.00319915		0	13	9	4	0	0
0	13	9	5	11	0.00293255		0	13	9	5	0	0
0	13	9	6	9	0.00239936		0	13	9	6	0	0
0	13	9	7	13	0.00346574		0	13	9	7	0	0
0	13	9	8	17	0.00453212		0	13	9	8	1	0.00273224
0	13	9	9	17	0.00453212		0	13	9	9	2	0.00546448
0	13	9	10	1120	0.298587		0	13	9	10	138	0.377049
0	13	10	0	2534	0.658695		0	13	10	0	241	0.637566
0	13	10	1	9	0.00233949		0	13	10	1	1	0.0026455
0	13	10	2	15	0.00389914		0	13	10	2	0	0
0	13	10	3	8	0.00207954		0	13	10	3	0	0
0	13	10	4	11	0.00285937		0	13	10	4	1	0.0026455
0	13	10	5	9	0.00233949		0	13	10	5	1	0.0026455
0	13	10	6	9	0.00233949		0	13	10	6	2	0.00529101
0	13	10	7	20	0.00519886		0	13	10	7	1	0.0026455
0	13	10	8	17	0.00441903		0	13	10	8	0	0
0	13	10	9	20	0.00519886		0	13	10	9	1	0.0026455
0	13	10	10	1195	0.310632		0	13	10	10	130	0.343915
0	13	11	0	2273	0.662103		0	13	11	0	237	0.61399
0	13	11	1	11	0.00320419		0	13	11	1	0	0
0	13	11	2	6	0.00174774		0	13	11	2	2	0.00518135
0	13	11	3	11	0.00320419		0	13	11	3	1	0.00259067
0	13	11	4	10	0.0029129		0	13	11	4	0	0
0	13	11	5	7	0.00203903		0	13	11	5	0	0
0	13	11	6	13	0.00378678		0	13	11	6	1	0.00259067
0	13	11	7	10	0.0029129		0	13	11	7	0	0
0	13	11	8	6	0.00174774		0	13	11	8	2	0.00518135
0	13	11	9	23	0.00669968		0	13	11	9	1	0.00259067
0	13	11	10	1063	0.309642		0	13	11	10	142	0.367876
0	13	12	0	2152	0.631085		0	13	12	0	210	0.503597
0	13	12	1	7	0.00205279		0	13	12	1	0	0
0	13	12	2	8	0.00234604		0	13	12	2	0	0
0	13	12	3	14	0.00410557		0	13	12	3	2	0.00479616
0	13	12	4	8	0.00234604		0	13	12	4	1	0.00239808
0	13	12	5	5	0.00146628		0	13	12	5	0	0
0	13	12	6	8	0.00234604		0	13	12	6	2	0.00479616
0	13	12	7	8	0.00234604		0	13	12	7	0	0
0	13	12	8	19	0.00557185		0	13	12	8	1	0.00239808
0	13	12	9	26	0.00762463		0	13	12	9	5	0.0119904
0	13	12	10	1155	0.33871		0	13	12	10	196	0.470024
0	13	13	0	963	0.0680133		0	13	13	0	98	0.0420962
0	13	13	1	6	0.000423759		0	13	13	1	0	0
0	13	13	2	5	0.000353132		0	13	13	2	1	0.000429553
0	13	13	3	3	0.000211879		0	13	13	3	3	0.00128866
0	13	13	4	8	0.000565012		0	13	13	4	0	0
0	13	13	5	4	0.000282506		0	13	13	5	1	0.000429553
0	13	13	6	3	0.000211879		0	13	13	6	0	0
0	13	13	7	9	0.000635638		0	13	13	7	0	0
0	13	13	8	9	0.000635638		0	13	13	8	1	0.000429553
0	13	13	9	23	0.00162441		0	13	13	9	2	0.000859106
0	13	13	10	13126	0.927043		0	13	13	10	2222	0.954467
0	14	0	0	6396	0.694387		0	14	0	0	833	0.628679
0	14	0	1	0	0		0	14	0	1	0	0
0	14	0	2	0	0		0	14	0	2	0	0
0	14	0	3	0	0		0	14	0	3	0	0
0	14	0	4	3	0.000325698		0	14	0	4	0	0
0	14	0	5	2	0.000217132		0	14	0	5	0	0
0	14	0	6	0	0		0	14	0	6	0	0
0	14	0	7	0	0		0	14	0	7	0	0
0	14	0	8	0	0		0	14	0	8	0	0
0	14	0	9	0	0		0	14	0	9	0	0
0	14	0	10	2810	0.30507		0	14	0	10	492	0.371321
0	14	1	0	7257	0.700821		0	14	1	0	616	0.658824
0	14	1	1	1	9.65717e-05		0	14	1	1	0	0
0	14	1	2	1	9.65717e-05		0	14	1	2	0	0
0	14	1	3	5	0.000482859		0	14	1	3	0	0
0	14	1	4	5	0.000482859		0	14	1	4	0	0
0	14	1	5	3	0.000289715		0	14	1	5	0	0
0	14	1	6	11	0.00106229		0	14	1	6	0	0
0	14	1	7	3	0.000289715		0	14	1	7	0	0
0	14	1	8	1	9.65717e-05		0	14	1	8	1	0.00106952
0	14	1	9	0	0		0	14	1	9	0	0
0	14	1	10	3068	0.296282		0	14	1	10	318	0.340107
0	14	2	0	5528	0.700811		0	14	2	0	402	0.614679
0	14	2	1	11	0.00139452		0	14	2	1	0	0
0	14	2	2	3	0.000380324		0	14	2	2	0	0
0	14	2	3	3	0.000380324		0	14	2	3	1	0.00152905
0	14	2	4	3	0.000380324		0	14	2	4	0	0
0	14	2	5	5	0.000633874		0	14	2	5	0	0
0	14	2	6	4	0.000507099		0	14	2	6	0	0
0	14	2	7	5	0.000633874		0	14	2	7	3	0.00458716
0	14	2	8	17	0.00215517		0	14	2	8	1	0.00152905
0	14	2	9	0	0		0	14	2	9	0	0
0	14	2	10	2309	0.292723		0	14	2	10	247	0.377676
0	14	3	0	4576	0.690196		0	14	3	0	367	0.662455
0	14	3	1	7	0.00105581		0	14	3	1	2	0.00361011
0	14	3	2	3	0.000452489		0	14	3	2	0	0
0	14	3	3	6	0.000904977		0	14	3	3	0	0
0	14	3	4	4	0.000603318		0	14	3	4	0	0
0	14	3	5	10	0.0015083		0	14	3	5	0	0
0	14	3	6	6	0.000904977		0	14	3	6	0	0
0	14	3	7	7	0.00105581		0	14	3	7	0	0
0	14	3	8	9	0.00135747		0	14	3	8	2	0.00361011
0	14	3	9	1	0.00015083		0	14	3	9	0	0
0	14	3	10	2001	0.30181		0	14	3	10	183	0.330325
0	14	4	0	4124	0.693459		0	14	4	0	324	0.644135
0	14	4	1	9	0.00151337		0	14	4	1	0	0
0	14	4	2	6	0.00100891		0	14	4	2	0	0
0	14	4	3	5	0.00084076		0	14	4	3	2	0.00397614
0	14	4	4	8	0.00134522		0	14	4	4	2	0.00397614
0	14	4	5	5	0.00084076		0	14	4	5	0	0
0	14	4	6	8	0.00134522		0	14	4	6	2	0.00397614
0	14	4	7	2	0.000336304		0	14	4	7	0	0
0	14	4	8	10	0.00168152		0	14	4	8	3	0.00596421
0	14	4	9	15	0.00252228		0	14	4	9	1	0.00198807
0	14	4	10	1755	0.295107		0	14	4	10	169	0.335984
0	14	5	0	3642	0.684586		0	14	5	0	259	0.607981
0	14	5	1	6	0.00112782		0	14	5	1	1	0.00234742
0	14	5	2	8	0.00150376		0	14	5	2	0	0
0	14	5	3	7	0.00131579		0	14	5	3	1	0.00234742
0	14	5	4	4	0.00075188		0	14	5	4	0	0
0	14	5	5	7	0.00131579		0	14	5	5	0	0
0	14	5	6	8	0.00150376		0	14	5	6	0	0
0	14	5	7	9	0.00169173		0	14	5	7	1	0.00234742
0	14	5	8	11	0.00206767		0	14	5	8	2	0.00469484
0	14	5	9	17	0.00319549		0	14	5	9	0	0
0	14	5	10	1601	0.30094		0	14	5	10	162	0.380282
0	14	6	0	3182	0.687405		0	14	6	0	276	0.620225
0	14	6	1	14	0.00302441		0	14	6	1	1	0.00224719
0	14	6	2	9	0.00194426		0	14	6	2	0	0
0	14	6	3	7	0.00151221		0	14	6	3	1	0.00224719
0	14	6	4	9	0.00194426		0	14	6	4	0	0
0	14	6	5	5	0.00108015		0	14	6	5	1	0.00224719
0	14	6	6	11	0.00237632		0	14	6	6	0	0
0	14	6	7	10	0.00216029		0	14	6	7	0	0
0	14	6	8	16	0.00345647		0	14	6	8	0	0
0	14	6	9	10	0.00216029		0	14	6	9	0	0
0	14	6	10	1356	0.292936		0	14	6	10	166	0.373034
0	14	7	0	2828	0.670301		0	14	7	0	259	0.600928
0	14	7	1	11	0.00260725		0	14	7	1	2	0.00464037
0	14	7	2	8	0.00189618		0	14	7	2	0	0
0	14	7	3	10	0.00237023		0	14	7	3	1	0.00232019
0	14	7	4	8	0.00189618		0	14	7	4	0	0
0	14	7	5	11	0.00260725		0	14	7	5	0	0
0	14	7	6	9	0.00213321		0	14	7	6	0	0
0	14	7	7	9	0.00213321		0	14	7	7	0	0
0	14	7	8	8	0.00189618		0	14	7	8	0	0
0	14	7	9	13	0.0030813		0	14	7	9	0	0
0	14	7	10	1304	0.309078		0	14	7	10	169	0.392111
0	14	8	0	2650	0.667506		0	14	8	0	264	0.668354
0	14	8	1	12	0.00302267		0	14	8	1	1	0.00253165
0	14	8	2	7	0.00176322		0	14	8	2	1	0.00253165
0	14	8	3	12	0.00302267		0	14	8	3	0	0
0	14	8	4	6	0.00151133		0	14	8	4	1	0.00253165
0	14	8	5	9	0.002267		0	14	8	5	1	0.00253165
0	14	8	6	15	0.00377834		0	14	8	6	0	0
0	14	8	7	11	0.00277078		0	14	8	7	0	0
0	14	8	8	11	0.00277078		0	14	8	8	2	0.00506329
0	14	8	9	18	0.004534		0	14	8	9	3	0.00759494
0	14	8	10	1219	0.307053		0	14	8	10	122	0.308861
0	14	9	0	2350	0.657527		0	14	9	0	196	0.597561
0	14	9	1	9	0.00251819		0	14	9	1	0	0
0	14	9	2	7	0.00195859		0	14	9	2	0	0
0	14	9	3	10	0.00279799		0	14	9	3	0	0
0	14	9	4	11	0.00307778		0	14	9	4	0	0
0	14	9	5	10	0.00279799		0	14	9	5	0	0
0	14	9	6	8	0.00223839		0	14	9	6	0	0
0	14	9	7	7	0.00195859		0	14	9	7	0	0
0	14	9	8	12	0.00335758		0	14	9	8	1	0.00304878
0	14	9	9	14	0.00391718		0	14	9	9	2	0.00609756
0	14	9	10	1136	0.317851		0	14	9	10	129	0.393293
0	14	10	0	2296	0.641879		0	14	10	0	203	0.559229
0	14	10	1	11	0.0030752		0	14	10	1	2	0.00550964
0	14	10	2	11	0.0030752		0	14	10	2	0	0
0	14	10	3	8	0.00223651		0	14	10	3	3	0.00826446
0	14	10	4	10	0.00279564		0	14	10	4	0	0
0	14	10	5	6	0.00167738		0	14	10	5	0	0
0	14	10	6	9	0.00251607		0	14	10	6	0	0
0	14	10	7	8	0.00223651		0	14	10	7	1	0.00275482
0	14	10	8	15	0.00419346		0	14	10	8	0	0
0	14	10	9	18	0.00503215		0	14	10	9	0	0
0	14	10	10	1185	0.331283		0	14	10	10	154	0.424242
0	14	11	0	2067	0.655358		0	14	11	0	196	0.595745
0	14	11	1	10	0.00317058		0	14	11	1	3	0.00911854
0	14	11	2	8	0.00253646		0	14	11	2	1	0.00303951
0	14	11	3	6	0.00190235		0	14	11	3	0	0
0	14	11	4	6	0.00190235		0	14	11	4	0	0
0	14	11	5	7	0.0022194		0	14	11	5	0	0
0	14	11	6	10	0.00317058		0	14	11	6	1	0.00303951
0	14	11	7	11	0.00348763		0	14	11	7	0	0
0	14	11	8	7	0.0022194		0	14	11	8	2	0.00607903
0	14	11	9	22	0.00697527		0	14	11	9	0	0
0	14	11	10	1000	0.317058		0	14	11	10	126	0.382979
0	14	12	0	2045	0.640865		0	14	12	0	198	0.584071
0	14	12	1	13	0.00407396		0	14	12	1	1	0.00294985
0	14	12	2	20	0.00626763		0	14	12	2	0	0
0	14	12	3	5	0.00156691		0	14	12	3	1	0.00294985
0	14	12	4	12	0.00376058		0	14	12	4	2	0.0058997
0	14	12	5	13	0.00407396		0	14	12	5	0	0
0	14	12	6	13	0.00407396		0	14	12	6	1	0.00294985
0	14	12	7	13	0.00407396		0	14	12	7	3	0.00884956
0	14	12	8	9	0.00282043		0	14	12	8	3	0.00884956
0	14	12	9	31	0.00971482		0	14	12	9	1	0.00294985
0	14	12	10	1017	0.318709		0	14	12	10	129	0.380531
0	14	13	0	1712	0.593003		0	14	13	0	171	0.472376
0	14	13	1	9	0.00311742		0	14	13	1	0	0
0	14	13	2	13	0.00450294		0	14	13	2	1	0.00276243
0	14	13	3	2	0.000692761		0	14	13	3	0	0
0	14	13	4	14	0.00484932		0	14	13	4	0	0
0	14	13	5	13	0.00450294		0	14	13	5	0	0
0	14	13	6	14	0.00484932		0	14	13	6	0	0
0	14	13	7	19	0.00658123		0	14	13	7	0	0
0	14	13	8	18	0.00623485		0	14	13	8	0	0
0	14	13	9	16	0.00554209		0	14	13	9	2	0.00552486
0	14	13	10	1057	0.366124		0	14	13	10	188	0.519337
0	14	14	0	774	0.0602804		0	14	14	0	101	0.0449688
0	14	14	1	9	0.000700935		0	14	14	1	1	0.000445236
0	14	14	2	2	0.000155763		0	14	14	2	0	0
0	14	14	3	2	0.000155763		0	14	14	3	1	0.000445236
0	14	14	4	9	0.000700935		0	14	14	4	0	0
0	14	14	5	8	0.000623053		0	14	14	5	0	0
0	14	14	6	8	0.000623053		0	14	14	6	0	0
0	14	14	7	7	0.000545171		0	14	14	7	0	0
0	14	14	8	15	0.00116822		0	14	14	8	1	0.000445236
0	14	14	9	15	0.00116822		0	14	14	9	1	0.000445236
0	14	14	10	11991	0.933879		0	14	14	10	2141	0.95325
0	15	0	0	6017	0.675157		0	15	0	0	812	0.638365
0	15	0	1	0	0		0	15	0	1	0	0
0	15	0	2	0	0		0	15	0	2	0	0
0	15	0	3	0	0		0	15	0	3	0	0
0	15	0	4	7	0.000785458		0	15	0	4	3	0.00235849
0	15	0	5	1	0.000112208		0	15	0	5	1	0.000786164
0	15	0	6	0	0		0	15	0	6	0	0
0	15	0	7	0	0		0	15	0	7	0	0
0	15	0	8	0	0		0	15	0	8	0	0
0	15	0	9	0	0		0	15	0	9	0	0
0	15	0	10	2887	0.323945		0	15	0	10	456	0.358491
0	15	1	0	7064	0.689844		0	15	1	0	510	0.636704
0	15	1	1	0	0		0	15	1	1	0	0
0	15	1	2	6	0.000585937		0	15	1	2	0	0
0	15	1	3	7	0.000683594		0	15	1	3	0	0
0	15	1	4	7	0.000683594		0	15	1	4	0	0
0	15	1	5	2	0.000195313		0	15	1	5	0	0
0	15	1	6	10	0.000976562		0	15	1	6	0	0
0	15	1	7	7	0.000683594		0	15	1	7	1	0.00124844
0	15	1	8	0	0		0	15	1	8	1	0.00124844
0	15	1	9	0	0		0	15	1	9	0	0
0	15	1	10	3137	0.306348		0	15	1	10	289	0.360799
0	15	2	0	5351	0.680702		0	15	2	0	364	0.589951
0	15	2	1	7	0.000890472		0	15	2	1	2	0.00324149
0	15	2	2	7	0.000890472		0	15	2	2	0	0
0	15	2	3	2	0.000254421		0	15	2	3	1	0.00162075
0	15	2	4	3	0.000381631		0	15	2	4	0	0
0	15	2	5	6	0.000763262		0	15	2	5	0	0
0	15	2	6	2	0.000254421		0	15	2	6	0	0
0	15	2	7	5	0.000636051		0	15	2	7	0	0
0	15	2	8	11	0.00139931		0	15	2	8	2	0.00324149
0	15	2	9	0	0		0	15	2	9	0	0
0	15	2	10	2467	0.313828		0	15	2	10	248	0.401945
0	15	3	0	4623	0.681456		0	15	3	0	333	0.617811
0	15	3	1	14	0.00206368		0	15	3	1	0	0
0	15	3	2	12	0.00176887		0	15	3	2	1	0.00185529
0	15	3	3	7	0.00103184		0	15	3	3	0	0
0	15	3	4	5	0.000737028		0	15	3	4	0	0
0	15	3	5	10	0.00147406		0	15	3	5	1	0.00185529
0	15	3	6	2	0.000294811		0	15	3	6	0	0
0	15	3	7	7	0.00103184		0	15	3	7	1	0.00185529
0	15	3	8	16	0.00235849		0	15	3	8	1	0.00185529
0	15	3	9	4	0.000589623		0	15	3	9	0	0
0	15	3	10	2084	0.307193		0	15	3	10	202	0.374768
0	15	4	0	3748	0.664421		0	15	4	0	339	0.644487
0	15	4	1	5	0.000886368		0	15	4	1	0	0
0	15	4	2	8	0.00141819		0	15	4	2	0	0
0	15	4	3	9	0.00159546		0	15	4	3	0	0
0	15	4	4	9	0.00159546		0	15	4	4	0	0
0	15	4	5	3	0.000531821		0	15	4	5	0	0
0	15	4	6	7	0.00124091		0	15	4	6	1	0.00190114
0	15	4	7	8	0.00141819		0	15	4	7	0	0
0	15	4	8	7	0.00124091		0	15	4	8	0	0
0	15	4	9	10	0.00177274		0	15	4	9	0	0
0	15	4	10	1827	0.323879		0	15	4	10	186	0.353612
0	15	5	0	3507	0.672354		0	15	5	0	276	0.627273
0	15	5	1	6	0.00115031		0	15	5	1	0	0
0	15	5	2	8	0.00153374		0	15	5	2	0	0
0	15	5	3	6	0.00115031		0	15	5	3	0	0
0	15	5	4	6	0.00115031		0	15	5	4	0	0
0	15	5	5	6	0.00115031		0	15	5	5	0	0
0	15	5	6	12	0.00230061		0	15	5	6	1	0.00227273
0	15	5	7	8	0.00153374		0	15	5	7	2	0.00454545
0	15	5	8	4	0.000766871		0	15	5	8	1	0.00227273
0	15	5	9	4	0.000766871		0	15	5	9	0	0
0	15	5	10	1649	0.316143		0	15	5	10	160	0.363636
0	15	6	0	3131	0.673623		0	15	6	0	255	0.605701
0	15	6	1	13	0.0027969		0	15	6	1	0	0
0	15	6	2	16	0.00344234		0	15	6	2	2	0.00475059
0	15	6	3	8	0.00172117		0	15	6	3	0	0
0	15	6	4	5	0.00107573		0	15	6	4	0	0
0	15	6	5	12	0.00258176		0	15	6	5	2	0.00475059
0	15	6	6	8	0.00172117		0	15	6	6	0	0
0	15	6	7	9	0.00193632		0	15	6	7	0	0
0	15	6	8	11	0.00236661		0	15	6	8	0	0
0	15	6	9	11	0.00236661		0	15	6	9	3	0.00712589
0	15	6	10	1424	0.306368		0	15	6	10	159	0.377672
0	15	7	0	2617	0.650995		0	15	7	0	265	0.646341
0	15	7	1	9	0.00223881		0	15	7	1	1	0.00243902
0	15	7	2	14	0.00348259		0	15	7	2	1	0.00243902
0	15	7	3	6	0.00149254		0	15	7	3	0	0
0	15	7	4	6	0.00149254		0	15	7	4	0	0
0	15	7	5	11	0.00273632		0	15	7	5	0	0
0	15	7	6	10	0.00248756		0	15	7	6	0	0
0	15	7	7	6	0.00149254		0	15	7	7	1	0.00243902
0	15	7	8	10	0.00248756		0	15	7	8	0	0
0	15	7	9	17	0.00422886		0	15	7	9	1	0.00243902
0	15	7	10	1314	0.326866		0	15	7	10	141	0.343902
0	15	8	0	2531	0.663086		0	15	8	0	211	0.643293
0	15	8	1	9	0.00235787		0	15	8	1	1	0.00304878
0	15	8	2	10	0.00261986		0	15	8	2	0	0
0	15	8	3	7	0.0018339		0	15	8	3	0	0
0	15	8	4	7	0.0018339		0	15	8	4	0	0
0	15	8	5	7	0.0018339		0	15	8	5	2	0.00609756
0	15	8	6	10	0.00261986		0	15	8	6	0	0
0	15	8	7	17	0.00445376		0	15	8	7	1	0.00304878
0	15	8	8	4	0.00104794		0	15	8	8	0	0
0	15	8	9	11	0.00288184		0	15	8	9	0	0
0	15	8	10	1204	0.315431		0	15	8	10	113	0.344512
0	15	9	0	2264	0.655852		0	15	9	0	231	0.641667
0	15	9	1	4	0.00115875		0	15	9	1	0	0
0	15	9	2	9	0.00260718		0	15	9	2	0	0
0	15	9	3	6	0.00173812		0	15	9	3	1	0.00277778
0	15	9	4	12	0.00347625		0	15	9	4	0	0
0	15	9	5	7	0.00202781		0	15	9	5	0	0
0	15	9	6	9	0.00260718		0	15	9	6	0	0
0	15	9	7	8	0.0023175		0	15	9	7	1	0.00277778
0	15	9	8	20	0.00579374		0	15	9	8	1	0.00277778
0	15	9	9	13	0.00376593		0	15	9	9	1	0.00277778
0	15	9	10	1100	0.318656		0	15	9	10	125	0.347222
0	15	10	0	2221	0.632764		0	15	10	0	185	0.545723
0	15	10	1	5	0.0014245		0	15	10	1	1	0.00294985
0	15	10	2	7	0.0019943		0	15	10	2	1	0.00294985
0	15	10	3	9	0.0025641		0	15	10	3	0	0
0	15	10	4	8	0.0022792		0	15	10	4	0	0
0	15	10	5	11	0.0031339		0	15	10	5	0	0
0	15	10	6	10	0.002849		0	15	10	6	0	0
0	15	10	7	9	0.0025641		0	15	10	7	0	0
0	15	10	8	18	0.00512821		0	15	10	8	1	0.00294985
0	15	10	9	14	0.0039886		0	15	10	9	1	0.00294985
0	15	10	10	1198	0.341311		0	15	10	10	150	0.442478
0	15	11	0	1906	0.628835		0	15	11	0	245	0.667575
0	15	11	1	11	0.00362917		0	15	11	1	0	0
0	15	11	2	7	0.00230947		0	15	11	2	2	0.00544959
0	15	11	3	7	0.00230947		0	15	11	3	0	0
0	15	11	4	7	0.00230947		0	15	11	4	0	0
0	15	11	5	4	0.0013197		0	15	11	5	0	0
0	15	11	6	11	0.00362917		0	15	11	6	1	0.0027248
0	15	11	7	11	0.00362917		0	15	11	7	0	0
0	15	11	8	12	0.00395909		0	15	11	8	1	0.0027248
0	15	11	9	12	0.00395909		0	15	11	9	4	0.0108992
0	15	11	10	1043	0.344111		0	15	11	10	114	0.310627
0	15	12	0	1807	0.63359		0	15	12	0	221	0.595687
0	15	12	1	7	0.00245442		0	15	12	1	0	0
0	15	12	2	11	0.00385694		0	15	12	2	1	0.00269542
0	15	12	3	16	0.0056101		0	15	12	3	0	0
0	15	12	4	5	0.00175316		0	15	12	4	1	0.00269542
0	15	12	5	13	0.0045582		0	15	12	5	0	0
0	15	12	6	12	0.00420757		0	15	12	6	2	0.00539084
0	15	12	7	3	0.00105189		0	15	12	7	1	0.00269542
0	15	12	8	11	0.00385694		0	15	12	8	0	0
0	15	12	9	20	0.00701262		0	15	12	9	1	0.00269542
0	15	12	10	947	0.332048		0	15	12	10	144	0.38814
0	15	13	0	1659	0.606138		0	15	13	0	165	0.517241
0	15	13	1	6	0.00219218		0	15	13	1	1	0.0031348
0	15	13	2	12	0.00438436		0	15	13	2	0	0
0	15	13	3	15	0.00548045		0	15	13	3	0	0
0	15	13	4	14	0.00511509		0	15	13	4	1	0.0031348
0	15	13	5	11	0.004019		0	15	13	5	3	0.00940439
0	15	13	6	6	0.00219218		0	15	13	6	0	0
0	15	13	7	13	0.00474973		0	15	13	7	3	0.00940439
0	15	13	8	17	0.00621118		0	15	13	8	0	0
0	15	13	9	16	0.00584582		0	15	13	9	2	0.00626959
0	15	13	10	968	0.353672		0	15	13	10	144	0.451411
0	15	14	0	1540	0.555355		0	15	14	0	157	0.460411
0	15	14	1	10	0.0036062		0	15	14	1	0	0
0	15	14	2	6	0.00216372		0	15	14	2	0	0
0	15	14	3	6	0.00216372		0	15	14	3	0	0
0	15	14	4	9	0.00324558		0	15	14	4	0	0
0	15	14	5	13	0.00468806		0	15	14	5	0	0
0	15	14	6	9	0.00324558		0	15	14	6	1	0.00293255
0	15	14	7	9	0.00324558		0	15	14	7	0	0
0	15	14	8	17	0.00613054		0	15	14	8	1	0.00293255
0	15	14	9	30	0.0108186		0	15	14	9	1	0.00293255
0	15	14	10	1124	0.405337		0	15	14	10	181	0.530792
0	15	15	0	803	0.0629903		0	15	15	0	90	0.0447094
0	15	15	1	4	0.000313775		0	15	15	1	0	0
0	15	15	2	6	0.000470662		0	15	15	2	0	0
0	15	15	3	1	7.84437e-05		0	15	15	3	0	0
0	15	15	4	8	0.000627549		0	15	15	4	0	0
0	15	15	5	4	0.000313775		0	15	15	5	0	0
0	15	15	6	1	7.84437e-05		0	15	15	6	1	0.000496771
0	15	15	7	7	0.000549106		0	15	15	7	0	0
0	15	15	8	12	0.000941324		0	15	15	8	0	0
0	15	15	9	30	0.00235331		0	15	15	9	1	0.000496771
0	15	15	10	11872	0.931283		0	15	15	10	1921	0.954297
0	16	0	0	5612	0.665008		0	16	0	0	837	0.626497
0	16	0	1	0	0		0	16	0	1	0	0
0	16	0	2	0	0		0	16	0	2	0	0
0	16	0	3	0	0		0	16	0	3	1	0.000748503
0	16	0	4	2	0.000236995		0	16	0	4	0	0
0	16	0	5	5	0.000592487		0	16	0	5	0	0
0	16	0	6	0	0		0	16	0	6	0	0
0	16	0	7	0	0		0	16	0	7	0	0
0	16	0	8	0	0		0	16	0	8	0	0
0	16	0	9	0	0		0	16	0	9	0	0
0	16	0	10	2820	0.334163		0	16	0	10	498	0.372754
0	16	1	0	6399	0.673508		0	16	1	0	520	0.607477
0	16	1	1	0	0		0	16	1	1	0	0
0	16	1	2	11	0.00115777		0	16	1	2	0	0
0	16	1	3	5	0.00052626		0	16	1	3	0	0
0	16	1	4	2	0.000210504		0	16	1	4	1	0.00116822
0	16	1	5	2	0.000210504		0	16	1	5	0	0
0	16	1	6	3	0.000315756		0	16	1	6	1	0.00116822
0	16	1	7	1	0.000105252		0	16	1	7	2	0.00233645
0	16	1	8	0	0		0	16	1	8	0	0
0	16	1	9	0	0		0	16	1	9	0	0
0	16	1	10	3078	0.323966		0	16	1	10	332	0.38785
0	16	2	0	4811	0.671177		0	16	2	0	439	0.620934
0	16	2	1	12	0.00167411		0	16	2	1	2	0.00282885
0	16	2	2	3	0.000418527		0	16	2	2	0	0
0	16	2	3	2	0.000279018		0	16	2	3	0	0
0	16	2	4	9	0.00125558		0	16	2	4	0	0
0	16	2	5	6	0.000837054		0	16	2	5	0	0
0	16	2	6	2	0.000279018		0	16	2	6	0	0
0	16	2	7	2	0.000279018		0	16	2	7	0	0
0	16	2	8	14	0.00195312		0	16	2	8	0	0
0	16	2	9	0	0		0	16	2	9	0	0
0	16	2	10	2307	0.321847		0	16	2	10	266	0.376238
0	16	3	0	3985	0.664167		0	16	3	0	281	0.601713
0	16	3	1	6	0.001		0	16	3	1	0	0
0	16	3	2	9	0.0015		0	16	3	2	0	0
0	16	3	3	4	0.000666667		0	16	3	3	0	0
0	16	3	4	5	0.000833333		0	16	3	4	1	0.00214133
0	16	3	5	6	0.001		0	16	3	5	0	0
0	16	3	6	3	0.0005		0	16	3	6	0	0
0	16	3	7	6	0.001		0	16	3	7	0	0
0	16	3	8	11	0.00183333		0	16	3	8	0	0
0	16	3	9	2	0.000333333		0	16	3	9	0	0
0	16	3	10	1963	0.327167		0	16	3	10	185	0.396146
0	16	4	0	3482	0.654757		0	16	4	0	255	0.553145
0	16	4	1	3	0.000564122		0	16	4	1	0	0
0	16	4	2	2	0.000376081		0	16	4	2	0	0
0	16	4	3	9	0.00169237		0	16	4	3	0	0
0	16	4	4	1	0.000188041		0	16	4	4	0	0
0	16	4	5	4	0.000752162		0	16	4	5	0	0
0	16	4	6	3	0.000564122		0	16	4	6	1	0.0021692
0	16	4	7	14	0.00263257		0	16	4	7	0	0
0	16	4	8	1	0.000188041		0	16	4	8	1	0.0021692
0	16	4	9	9	0.00169237		0	16	4	9	0	0
0	16	4	10	1790	0.336593		0	16	4	10	204	0.442516
0	16	5	0	3198	0.64855		0	16	5	0	233	0.543124
0	16	5	1	4	0.000811194		0	16	5	1	1	0.002331
0	16	5	2	7	0.00141959		0	16	5	2	0	0
0	16	5	3	9	0.00182519		0	16	5	3	2	0.004662
0	16	5	4	11	0.00223078		0	16	5	4	0	0
0	16	5	5	7	0.00141959		0	16	5	5	0	0
0	16	5	6	6	0.00121679		0	16	5	6	1	0.002331
0	16	5	7	7	0.00141959		0	16	5	7	1	0.002331
0	16	5	8	5	0.00101399		0	16	5	8	1	0.002331
0	16	5	9	9	0.00182519		0	16	5	9	1	0.002331
0	16	5	10	1668	0.338268		0	16	5	10	189	0.440559
0	16	6	0	2772	0.653465		0	16	6	0	256	0.593968
0	16	6	1	10	0.00235738		0	16	6	1	1	0.00232019
0	16	6	2	7	0.00165017		0	16	6	2	1	0.00232019
0	16	6	3	4	0.000942951		0	16	6	3	0	0
0	16	6	4	3	0.000707214		0	16	6	4	0	0
0	16	6	5	8	0.0018859		0	16	6	5	0	0
0	16	6	6	8	0.0018859		0	16	6	6	0	0
0	16	6	7	5	0.00117869		0	16	6	7	2	0.00464037
0	16	6	8	6	0.00141443		0	16	6	8	1	0.00232019
0	16	6	9	12	0.00282885		0	16	6	9	0	0
0	16	6	10	1407	0.331683		0	16	6	10	170	0.394432
0	16	7	0	2559	0.644422		0	16	7	0	186	0.57764
0	16	7	1	9	0.00226643		0	16	7	1	0	0
0	16	7	2	8	0.00201461		0	16	7	2	0	0
0	16	7	3	5	0.00125913		0	16	7	3	2	0.00621118
0	16	7	4	7	0.00176278		0	16	7	4	0	0
0	16	7	5	3	0.000755477		0	16	7	5	0	0
0	16	7	6	6	0.00151095		0	16	7	6	0	0
0	16	7	7	4	0.0010073		0	16	7	7	0	0
0	16	7	8	11	0.00277008		0	16	7	8	0	0
0	16	7	9	11	0.00277008		0	16	7	9	2	0.00621118
0	16	7	10	1348	0.339461		0	16	7	10	132	0.409938
0	16	8	0	2467	0.653856		0	16	8	0	212	0.534005
0	16	8	1	5	0.00132521		0	16	8	1	0	0
0	16	8	2	6	0.00159025		0	16	8	2	1	0.00251889
0	16	8	3	9	0.00238537		0	16	8	3	0	0
0	16	8	4	8	0.00212033		0	16	8	4	0	0
0	16	8	5	7	0.00185529		0	16	8	5	0	0
0	16	8	6	7	0.00185529		0	16	8	6	0	0
0	16	8	7	7	0.00185529		0	16	8	7	0	0
0	16	8	8	7	0.00185529		0	16	8	8	2	0.00503778
0	16	8	9	23	0.00609594		0	16	8	9	2	0.00503778
0	16	8	10	1227	0.325205		0	16	8	10	180	0.453401
0	16	9	0	2116	0.652885		0	16	9	0	184	0.59164
0	16	9	1	2	0.000617094		0	16	9	1	0	0
0	16	9	2	6	0.00185128		0	16	9	2	1	0.00321543
0	16	9	3	3	0.00092564		0	16	9	3	0	0
0	16	9	4	10	0.00308547		0	16	9	4	0	0
0	16	9	5	6	0.00185128		0	16	9	5	1	0.00321543
0	16	9	6	7	0.00215983		0	16	9	6	1	0.00321543
0	16	9	7	6	0.00185128		0	16	9	7	0	0
0	16	9	8	13	0.00401111		0	16	9	8	0	0
0	16	9	9	14	0.00431965		0	16	9	9	1	0.00321543
0	16	9	10	1058	0.326442		0	16	9	10	123	0.395498
0	16	10	0	2008	0.617276		0	16	10	0	179	0.570064
0	16	10	1	6	0.00184445		0	16	10	1	1	0.00318471
0	16	10	2	6	0.00184445		0	16	10	2	2	0.00636943
0	16	10	3	11	0.00338149		0	16	10	3	0	0
0	16	10	4	14	0.00430372		0	16	10	4	0	0
0	16	10	5	4	0.00122963		0	16	10	5	2	0.00636943
0	16	10	6	11	0.00338149		0	16	10	6	0	0
0	16	10	7	3	0.000922226		0	16	10	7	0	0
0	16	10	8	15	0.00461113		0	16	10	8	1	0.00318471
0	16	10	9	13	0.00399631		0	16	10	9	3	0.00955414
0	16	10	10	1162	0.357209		0	16	10	10	126	0.401274
0	16	11	0	1715	0.598395		0	16	11	0	180	0.656934
0	16	11	1	9	0.00314027		0	16	11	1	0	0
0	16	11	2	13	0.00453594		0	16	11	2	0	0
0	16	11	3	7	0.00244243		0	16	11	3	0	0
0	16	11	4	14	0.00488486		0	16	11	4	0	0
0	16	11	5	11	0.0038381		0	16	11	5	0	0
0	16	11	6	13	0.00453594		0	16	11	6	0	0
0	16	11	7	14	0.00488486		0	16	11	7	0	0
0	16	11	8	5	0.00174459		0	16	11	8	1	0.00364964
0	16	11	9	23	0.00802512		0	16	11	9	1	0.00364964
0	16	11	10	1042	0.363573		0	16	11	10	92	0.335766
0	16	12	0	1720	0.621387		0	16	12	0	142	0.568
0	16	12	1	3	0.00108381		0	16	12	1	0	0
0	16	12	2	13	0.00469653		0	16	12	2	0	0
0	16	12	3	5	0.00180636		0	16	12	3	0	0
0	16	12	4	13	0.00469653		0	16	12	4	0	0
0	16	12	5	10	0.00361272		0	16	12	5	1	0.004
0	16	12	6	16	0.00578035		0	16	12	6	0	0
0	16	12	7	19	0.00686416		0	16	12	7	0	0
0	16	12	8	10	0.00361272		0	16	12	8	2	0.008
0	16	12	9	24	0.00867052		0	16	12	9	1	0.004
0	16	12	10	935	0.337789		0	16	12	10	104	0.416
0	16	13	0	1516	0.604466		0	16	13	0	157	0.537671
0	16	13	1	8	0.00318979		0	16	13	1	1	0.00342466
0	16	13	2	10	0.00398724		0	16	13	2	1	0.00342466
0	16	13	3	5	0.00199362		0	16	13	3	2	0.00684932
0	16	13	4	12	0.00478469		0	16	13	4	1	0.00342466
0	16	13	5	12	0.00478469		0	16	13	5	0	0
0	16	13	6	13	0.00518341		0	16	13	6	0	0
0	16	13	7	13	0.00518341		0	16	13	7	0	0
0	16	13	8	13	0.00518341		0	16	13	8	1	0.00342466
0	16	13	9	14	0.00558214		0	16	13	9	0	0
0	16	13	10	892	0.355662		0	16	13	10	129	0.441781
0	16	14	0	1493	0.616687		0	16	14	0	138	0.511111
0	16	14	1	14	0.00578273		0	16	14	1	0	0
0	16	14	2	10	0.00413052		0	16	14	2	0	0
0	16	14	3	7	0.00289137		0	16	14	3	0	0
0	16	14	4	12	0.00495663		0	16	14	4	1	0.0037037
0	16	14	5	15	0.00619579		0	16	14	5	1	0.0037037
0	16	14	6	10	0.00413052		0	16	14	6	0	0
0	16	14	7	17	0.00702189		0	16	14	7	1	0.0037037
0	16	14	8	15	0.00619579		0	16	14	8	1	0.0037037
0	16	14	9	17	0.00702189		0	16	14	9	0	0
0	16	14	10	811	0.334986		0	16	14	10	128	0.474074
0	16	15	0	1411	0.562824		0	16	15	0	161	0.472141
0	16	15	1	12	0.0047866		0	16	15	1	1	0.00293255
0	16	15	2	14	0.00558436		0	16	15	2	1	0.00293255
0	16	15	3	9	0.00358995		0	16	15	3	1	0.00293255
0	16	15	4	14	0.00558436		0	16	15	4	0	0
0	16	15	5	8	0.00319106		0	16	15	5	0	0
0	16	15	6	13	0.00518548		0	16	15	6	0	0
0	16	15	7	15	0.00598325		0	16	15	7	0	0
0	16	15	8	14	0.00558436		0	16	15	8	0	0
0	16	15	9	33	0.0131631		0	16	15	9	4	0.0117302
0	16	15	10	964	0.384523		0	16	15	10	173	0.507331
0	16	16	0	680	0.0573694		0	16	16	0	64	0.0302172
0	16	16	1	4	0.000337467		0	16	16	1	0	0
0	16	16	2	4	0.000337467		0	16	16	2	1	0.000472144
0	16	16	3	7	0.000590568		0	16	16	3	0	0
0	16	16	4	6	0.000506201		0	16	16	4	1	0.000472144
0	16	16	5	4	0.000337467		0	16	16	5	0	0
0	16	16	6	5	0.000421834		0	16	16	6	1	0.000472144
0	16	16	7	7	0.000590568		0	16	16	7	0	0
0	16	16	8	8	0.000674935		0	16	16	8	1	0.000472144
0	16	16	9	22	0.00185607		0	16	16	9	5	0.00236072
0	16	16	10	11106	0.936978		0	16	16	10	2045	0.965534
0	17	0	0	5355	0.628447		0	17	0	0	691	0.560422
0	17	0	1	0	0		0	17	0	1	0	0
0	17	0	2	0	0		0	17	0	2	0	0
0	17	0	3	0	0		0	17	0	3	0	0
0	17	0	4	4	0.000469428		0	17	0	4	0	0
0	17	0	5	3	0.000352071		0	17	0	5	1	0.00081103
0	17	0	6	0	0		0	17	0	6	0	0
0	17	0	7	0	0		0	17	0	7	0	0
0	17	0	8	0	0		0	17	0	8	0	0
0	17	0	9	0	0		0	17	0	9	0	0
0	17	0	10	3159	0.370731		0	17	0	10	541	0.438767
0	17	1	0	6214	0.656385		0	17	1	0	463	0.577307
0	17	1	1	1	0.00010563		0	17	1	1	0	0
0	17	1	2	12	0.00126756		0	17	1	2	0	0
0	17	1	3	9	0.000950671		0	17	1	3	1	0.00124688
0	17	1	4	5	0.00052815		0	17	1	4	1	0.00124688
0	17	1	5	1	0.00010563		0	17	1	5	0	0
0	17	1	6	6	0.00063378		0	17	1	6	1	0.00124688
0	17	1	7	10	0.0010563		0	17	1	7	1	0.00124688
0	17	1	8	3	0.00031689		0	17	1	8	0	0
0	17	1	9	0	0		0	17	1	9	0	0
0	17	1	10	3206	0.33865		0	17	1	10	335	0.417706
0	17	2	0	4595	0.637309		0	17	2	0	366	0.616162
0	17	2	1	11	0.00152566		0	17	2	1	0	0
0	17	2	2	6	0.000832177		0	17	2	2	0	0
0	17	2	3	3	0.000416089		0	17	2	3	0	0
0	17	2	4	10	0.00138696		0	17	2	4	0	0
0	17	2	5	8	0.00110957		0	17	2	5	1	0.0016835
0	17	2	6	2	0.000277393		0	17	2	6	2	0.003367
0	17	2	7	2	0.000277393		0	17	2	7	2	0.003367
0	17	2	8	7	0.000970874		0	17	2	8	0	0
0	17	2	9	0	0		0	17	2	9	0	0
0	17	2	10	2566	0.355895		0	17	2	10	223	0.375421
0	17	3	0	4019	0.651167		0	17	3	0	274	0.529981
0	17	3	1	8	0.00129618		0	17	3	1	1	0.00193424
0	17	3	2	12	0.00194426		0	17	3	2	0	0
0	17	3	3	5	0.00081011		0	17	3	3	0	0
0	17	3	4	6	0.000972132		0	17	3	4	0	0
0	17	3	5	6	0.000972132		0	17	3	5	1	0.00193424
0	17	3	6	5	0.00081011		0	17	3	6	2	0.00386847
0	17	3	7	4	0.000648088		0	17	3	7	0	0
0	17	3	8	7	0.00113415		0	17	3	8	1	0.00193424
0	17	3	9	4	0.000648088		0	17	3	9	1	0.00193424
0	17	3	10	2096	0.339598		0	17	3	10	237	0.458414
0	17	4	0	3446	0.648842		0	17	4	0	241	0.576555
0	17	4	1	7	0.00131802		0	17	4	1	0	0
0	17	4	2	4	0.000753154		0	17	4	2	0	0
0	17	4	3	3	0.000564865		0	17	4	3	1	0.00239234
0	17	4	4	0	0		0	17	4	4	1	0.00239234
0	17	4	5	5	0.000941442		0	17	4	5	0	0
0	17	4	6	5	0.000941442		0	17	4	6	0	0
0	17	4	7	4	0.000753154		0	17	4	7	0	0
0	17	4	8	9	0.0016946		0	17	4	8	0	0
0	17	4	9	8	0.00150631		0	17	4	9	2	0.00478469
0	17	4	10	1820	0.342685		0	17	4	10	173	0.413876
0	17	5	0	3161	0.636528		0	17	5	0	209	0.534527
0	17	5	1	6	0.00120822		0	17	5	1	0	0
0	17	5	2	6	0.00120822		0	17	5	2	1	0.00255754
0	17	5	3	4	0.000805477		0	17	5	3	0	0
0	17	5	4	2	0.000402739		0	17	5	4	1	0.00255754
0	17	5	5	9	0.00181232		0	17	5	5	0	0
0	17	5	6	6	0.00120822		0	17	5	6	1	0.00255754
0	17	5	7	6	0.00120822		0	17	5	7	0	0
0	17	5	8	4	0.000805477		0	17	5	8	1	0.00255754
0	17	5	9	6	0.00120822		0	17	5	9	0	0
0	17	5	10	1756	0.353605		0	17	5	10	178	0.455243
0	17	6	0	2785	0.656685		0	17	6	0	224	0.57732
0	17	6	1	9	0.00212214		0	17	6	1	0	0
0	17	6	2	7	0.00165055		0	17	6	2	0	0
0	17	6	3	7	0.00165055		0	17	6	3	0	0
0	17	6	4	6	0.00141476		0	17	6	4	0	0
0	17	6	5	6	0.00141476		0	17	6	5	1	0.00257732
0	17	6	6	7	0.00165055		0	17	6	6	1	0.00257732
0	17	6	7	5	0.00117897		0	17	6	7	0	0
0	17	6	8	5	0.00117897		0	17	6	8	0	0
0	17	6	9	7	0.00165055		0	17	6	9	2	0.00515464
0	17	6	10	1397	0.329403		0	17	6	10	160	0.412371
0	17	7	0	2464	0.623009		0	17	7	0	173	0.538941
0	17	7	1	7	0.00176991		0	17	7	1	0	0
0	17	7	2	7	0.00176991		0	17	7	2	0	0
0	17	7	3	7	0.00176991		0	17	7	3	0	0
0	17	7	4	4	0.00101138		0	17	7	4	0	0
0	17	7	5	8	0.00202276		0	17	7	5	0	0
0	17	7	6	8	0.00202276		0	17	7	6	0	0
0	17	7	7	5	0.00126422		0	17	7	7	0	0
0	17	7	8	4	0.00101138		0	17	7	8	1	0.00311526
0	17	7	9	8	0.00202276		0	17	7	9	1	0.00311526
0	17	7	10	1433	0.362326		0	17	7	10	146	0.454829
0	17	8	0	2292	0.642197		0	17	8	0	208	0.585915
0	17	8	1	4	0.00112076		0	17	8	1	0	0
0	17	8	2	3	0.000840572		0	17	8	2	1	0.0028169
0	17	8	3	9	0.00252171		0	17	8	3	0	0
0	17	8	4	13	0.00364248		0	17	8	4	0	0
0	17	8	5	9	0.00252171		0	17	8	5	1	0.0028169
0	17	8	6	5	0.00140095		0	17	8	6	0	0
0	17	8	7	5	0.00140095		0	17	8	7	0	0
0	17	8	8	9	0.00252171		0	17	8	8	0	0
0	17	8	9	13	0.00364248		0	17	8	9	3	0.0084507
0	17	8	10	1207	0.33819		0	17	8	10	142	0.4
0	17	9	0	1889	0.614109		0	17	9	0	178	0.593333
0	17	9	1	9	0.00292588		0	17	9	1	0	0
0	17	9	2	12	0.00390117		0	17	9	2	0	0
0	17	9	3	7	0.00227568		0	17	9	3	1	0.00333333
0	17	9	4	4	0.00130039		0	17	9	4	0	0
0	17	9	5	7	0.00227568		0	17	9	5	0	0
0	17	9	6	14	0.00455137		0	17	9	6	0	0
0	17	9	7	9	0.00292588		0	17	9	7	0	0
0	17	9	8	14	0.00455137		0	17	9	8	0	0
0	17	9	9	9	0.00292588		0	17	9	9	0	0
0	17	9	10	1102	0.358257		0	17	9	10	121	0.403333
0	17	10	0	1840	0.601504		0	17	10	0	192	0.57485
0	17	10	1	15	0.00490356		0	17	10	1	0	0
0	17	10	2	7	0.00228833		0	17	10	2	0	0
0	17	10	3	8	0.00261523		0	17	10	3	0	0
0	17	10	4	5	0.00163452		0	17	10	4	2	0.00598802
0	17	10	5	8	0.00261523		0	17	10	5	1	0.00299401
0	17	10	6	7	0.00228833		0	17	10	6	2	0.00598802
0	17	10	7	12	0.00392285		0	17	10	7	0	0
0	17	10	8	12	0.00392285		0	17	10	8	1	0.00299401
0	17	10	9	15	0.00490356		0	17	10	9	1	0.00299401
0	17	10	10	1130	0.369402		0	17	10	10	135	0.404192
0	17	11	0	1608	0.580087		0	17	11	0	137	0.518939
0	17	11	1	4	0.001443		0	17	11	1	0	0
0	17	11	2	10	0.0036075		0	17	11	2	0	0
0	17	11	3	8	0.002886		0	17	11	3	0	0
0	17	11	4	9	0.00324675		0	17	11	4	1	0.00378788
0	17	11	5	16	0.00577201		0	17	11	5	0	0
0	17	11	6	7	0.00252525		0	17	11	6	3	0.0113636
0	17	11	7	14	0.00505051		0	17	11	7	0	0
0	17	11	8	13	0.00468975		0	17	11	8	1	0.00378788
0	17	11	9	16	0.00577201		0	17	11	9	1	0.00378788
0	17	11	10	1067	0.384921		0	17	11	10	121	0.458333
0	17	12	0	1605	0.61707		0	17	12	0	162	0.589091
0	17	12	1	2	0.000768935		0	17	12	1	0	0
0	17	12	2	5	0.00192234		0	17	12	2	0	0
0	17	12	3	12	0.00461361		0	17	12	3	1	0.00363636
0	17	12	4	12	0.00461361		0	17	12	4	1	0.00363636
0	17	12	5	7	0.00269127		0	17	12	5	1	0.00363636
0	17	12	6	19	0.00730488		0	17	12	6	1	0.00363636
0	17	12	7	11	0.00422914		0	17	12	7	0	0
0	17	12	8	8	0.00307574		0	17	12	8	0	0
0	17	12	9	11	0.00422914		0	17	12	9	0	0
0	17	12	10	909	0.349481		0	17	12	10	109	0.396364
0	17	13	0	1501	0.60671		0	17	13	0	138	0.526718
0	17	13	1	6	0.00242522		0	17	13	1	0	0
0	17	13	2	9	0.00363783		0	17	13	2	0	0
0	17	13	3	16	0.00646726		0	17	13	3	1	0.00381679
0	17	13	4	7	0.00282943		0	17	13	4	1	0.00381679
0	17	13	5	6	0.00242522		0	17	13	5	0	0
0	17	13	6	7	0.00282943		0	17	13	6	0	0
0	17	13	7	12	0.00485044		0	17	13	7	1	0.00381679
0	17	13	8	13	0.00525465		0	17	13	8	1	0.00381679
0	17	13	9	15	0.00606306		0	17	13	9	1	0.00381679
0	17	13	10	882	0.356508		0	17	13	10	119	0.454198
0	17	14	0	1357	0.588976		0	17	14	0	141	0.494737
0	17	14	1	10	0.00434028		0	17	14	1	0	0
0	17	14	2	7	0.00303819		0	17	14	2	2	0.00701754
0	17	14	3	4	0.00173611		0	17	14	3	1	0.00350877
0	17	14	4	6	0.00260417		0	17	14	4	0	0
0	17	14	5	5	0.00217014		0	17	14	5	0	0
0	17	14	6	8	0.00347222		0	17	14	6	0	0
0	17	14	7	11	0.00477431		0	17	14	7	0	0
0	17	14	8	17	0.00737847		0	17	14	8	0	0
0	17	14	9	11	0.00477431		0	17	14	9	2	0.00701754
0	17	14	10	868	0.376736		0	17	14	10	139	0.487719
0	17	15	0	1267	0.559135		0	17	15	0	155	0.523649
0	17	15	1	11	0.00485437		0	17	15	1	0	0
0	17	15	2	13	0.00573698		0	17	15	2	3	0.0101351
0	17	15	3	18	0.00794351		0	17	15	3	0	0
0	17	15	4	11	0.00485437		0	17	15	4	0	0
0	17	15	5	11	0.00485437		0	17	15	5	0	0
0	17	15	6	9	0.00397176		0	17	15	6	0	0
0	17	15	7	12	0.00529568		0	17	15	7	2	0.00675676
0	17	15	8	25	0.0110327		0	17	15	8	0	0
0	17	15	9	15	0.00661959		0	17	15	9	3	0.0101351
0	17	15	10	874	0.385702		0	17	15	10	133	0.449324
0	17	16	0	1160	0.513957		0	17	16	0	144	0.43769
0	17	16	1	4	0.00177226		0	17	16	1	1	0.00303951
0	17	16	2	10	0.00443066		0	17	16	2	1	0.00303951
0	17	16	3	18	0.00797519		0	17	16	3	1	0.00303951
0	17	16	4	7	0.00310146		0	17	16	4	0	0
0	17	16	5	7	0.00310146		0	17	16	5	0	0
0	17	16	6	13	0.00575986		0	17	16	6	0	0
0	17	16	7	9	0.00398759		0	17	16	7	2	0.00607903
0	17	16	8	10	0.00443066		0	17	16	8	0	0
0	17	16	9	24	0.0106336		0	17	16	9	3	0.00911854
0	17	16	10	995	0.440851		0	17	16	10	177	0.537994
0	17	17	0	617	0.0531759		0	17	17	0	60	0.0280243
0	17	17	1	3	0.000258554		0	17	17	1	0	0
0	17	17	2	6	0.000517108		0	17	17	2	2	0.000934143
0	17	17	3	5	0.000430923		0	17	17	3	0	0
0	17	17	4	2	0.000172369		0	17	17	4	0	0
0	17	17	5	4	0.000344738		0	17	17	5	0	0
0	17	17	6	5	0.000430923		0	17	17	6	0	0
0	17	17	7	9	0.000775662		0	17	17	7	0	0
0	17	17	8	11	0.000948031		0	17	17	8	0	0
0	17	17	9	16	0.00137895		0	17	17	9	11	0.00513779
0	17	17	10	10925	0.941567		0	17	17	10	2068	0.965904
0	18	0	0	5170	0.619978		0	18	0	0	648	0.546374
0	18	0	1	0	0		0	18	0	1	0	0
0	18	0	2	0	0		0	18	0	2	0	0
0	18	0	3	0	0		0	18	0	3	0	0
0	18	0	4	9	0.00107927		0	18	0	4	0	0
0	18	0	5	6	0.000719511		0	18	0	5	0	0
0	18	0	6	0	0		0	18	0	6	0	0
0	18	0	7	0	0		0	18	0	7	0	0
0	18	0	8	0	0		0	18	0	8	0	0
0	18	0	9	0	0		0	18	0	9	0	0
0	18	0	10	3154	0.378223		0	18	0	10	538	0.453626
0	18	1	0	5657	0.628276		0	18	1	0	475	0.570913
0	18	1	1	1	0.000111062		0	18	1	1	0	0
0	18	1	2	5	0.000555309		0	18	1	2	0	0
0	18	1	3	10	0.00111062		0	18	1	3	1	0.00120192
0	18	1	4	6	0.00066637		0	18	1	4	1	0.00120192
0	18	1	5	5	0.000555309		0	18	1	5	2	0.00240385
0	18	1	6	7	0.000777432		0	18	1	6	0	0
0	18	1	7	8	0.000888494		0	18	1	7	0	0
0	18	1	8	2	0.000222123		0	18	1	8	0	0
0	18	1	9	0	0		0	18	1	9	0	0
0	18	1	10	3303	0.366837		0	18	1	10	353	0.424279
0	18	2	0	4194	0.623643		0	18	2	0	362	0.548485
0	18	2	1	7	0.00104089		0	18	2	1	0	0
0	18	2	2	2	0.000297398		0	18	2	2	0	0
0	18	2	3	5	0.000743494		0	18	2	3	0	0
0	18	2	4	3	0.000446097		0	18	2	4	0	0
0	18	2	5	4	0.000594796		0	18	2	5	5	0.00757576
0	18	2	6	6	0.000892193		0	18	2	6	0	0
0	18	2	7	5	0.000743494		0	18	2	7	0	0
0	18	2	8	12	0.00178439		0	18	2	8	0	0
0	18	2	9	0	0		0	18	2	9	0	0
0	18	2	10	2487	0.369814		0	18	2	10	293	0.443939
0	18	3	0	3811	0.627015		0	18	3	0	289	0.544256
0	18	3	1	11	0.00180981		0	18	3	1	0	0
0	18	3	2	10	0.00164528		0	18	3	2	1	0.00188324
0	18	3	3	7	0.00115169		0	18	3	3	0	0
0	18	3	4	3	0.000493583		0	18	3	4	0	0
0	18	3	5	4	0.000658111		0	18	3	5	1	0.00188324
0	18	3	6	7	0.00115169		0	18	3	6	0	0
0	18	3	7	8	0.00131622		0	18	3	7	0	0
0	18	3	8	5	0.000822639		0	18	3	8	0	0
0	18	3	9	3	0.000493583		0	18	3	9	0	0
0	18	3	10	2209	0.363442		0	18	3	10	240	0.451977
0	18	4	0	3230	0.632341		0	18	4	0	221	0.527446
0	18	4	1	8	0.00156617		0	18	4	1	1	0.00238663
0	18	4	2	4	0.000783085		0	18	4	2	0	0
0	18	4	3	4	0.000783085		0	18	4	3	3	0.0071599
0	18	4	4	7	0.0013704		0	18	4	4	0	0
0	18	4	5	9	0.00176194		0	18	4	5	1	0.00238663
0	18	4	6	4	0.000783085		0	18	4	6	0	0
0	18	4	7	2	0.000391543		0	18	4	7	0	0
0	18	4	8	2	0.000391543		0	18	4	8	0	0
0	18	4	9	10	0.00195771		0	18	4	9	0	0
0	18	4	10	1828	0.35787		0	18	4	10	193	0.460621
0	18	5	0	2851	0.617634		0	18	5	0	223	0.576227
0	18	5	1	3	0.000649913		0	18	5	1	1	0.00258398
0	18	5	2	4	0.000866551		0	18	5	2	0	0
0	18	5	3	5	0.00108319		0	18	5	3	1	0.00258398
0	18	5	4	9	0.00194974		0	18	5	4	0	0
0	18	5	5	10	0.00216638		0	18	5	5	0	0
0	18	5	6	9	0.00194974		0	18	5	6	1	0.00258398
0	18	5	7	5	0.00108319		0	18	5	7	1	0.00258398
0	18	5	8	4	0.000866551		0	18	5	8	0	0
0	18	5	9	12	0.00259965		0	18	5	9	0	0
0	18	5	10	1704	0.369151		0	18	5	10	160	0.413437
0	18	6	0	2584	0.622801		0	18	6	0	203	0.576705
0	18	6	1	7	0.00168715		0	18	6	1	0	0
0	18	6	2	6	0.00144613		0	18	6	2	0	0
0	18	6	3	8	0.00192818		0	18	6	3	1	0.00284091
0	18	6	4	1	0.000241022		0	18	6	4	1	0.00284091
0	18	6	5	5	0.00120511		0	18	6	5	0	0
0	18	6	6	3	0.000723066		0	18	6	6	1	0.00284091
0	18	6	7	10	0.00241022		0	18	6	7	0	0
0	18	6	8	8	0.00192818		0	18	6	8	2	0.00568182
0	18	6	9	6	0.00144613		0	18	6	9	0	0
0	18	6	10	1511	0.364184		0	18	6	10	144	0.409091
0	18	7	0	2305	0.619291		0	18	7	0	177	0.519062
0	18	7	1	10	0.00268673		0	18	7	1	0	0
0	18	7	2	7	0.00188071		0	18	7	2	2	0.0058651
0	18	7	3	5	0.00134336		0	18	7	3	0	0
0	18	7	4	5	0.00134336		0	18	7	4	0	0
0	18	7	5	3	0.000806018		0	18	7	5	0	0
0	18	7	6	5	0.00134336		0	18	7	6	0	0
0	18	7	7	9	0.00241805		0	18	7	7	1	0.00293255
0	18	7	8	9	0.00241805		0	18	7	8	4	0.0117302
0	18	7	9	8	0.00214938		0	18	7	9	3	0.00879765
0	18	7	10	1356	0.36432		0	18	7	10	154	0.451613
0	18	8	0	2034	0.616177		0	18	8	0	202	0.629283
0	18	8	1	11	0.00333232		0	18	8	1	0	0
0	18	8	2	5	0.00151469		0	18	8	2	1	0.00311526
0	18	8	3	8	0.00242351		0	18	8	3	0	0
0	18	8	4	4	0.00121175		0	18	8	4	0	0
0	18	8	5	10	0.00302938		0	18	8	5	0	0
0	18	8	6	3	0.000908816		0	18	8	6	2	0.00623053
0	18	8	7	10	0.00302938		0	18	8	7	0	0
0	18	8	8	10	0.00302938		0	18	8	8	3	0.00934579
0	18	8	9	8	0.00242351		0	18	8	9	1	0.00311526
0	18	8	10	1198	0.36292		0	18	8	10	112	0.34891
0	18	9	0	1821	0.606596		0	18	9	0	172	0.6121
0	18	9	1	6	0.00199867		0	18	9	1	0	0
0	18	9	2	6	0.00199867		0	18	9	2	0	0
0	18	9	3	8	0.00266489		0	18	9	3	1	0.00355872
0	18	9	4	5	0.00166556		0	18	9	4	0	0
0	18	9	5	8	0.00266489		0	18	9	5	0	0
0	18	9	6	10	0.00333111		0	18	9	6	1	0.00355872
0	18	9	7	9	0.002998		0	18	9	7	0	0
0	18	9	8	5	0.00166556		0	18	9	8	0	0
0	18	9	9	5	0.00166556		0	18	9	9	2	0.00711744
0	18	9	10	1119	0.372751		0	18	9	10	105	0.373665
0	18	10	0	1853	0.591824		0	18	10	0	166	0.538961
0	18	10	1	6	0.00191632		0	18	10	1	0	0
0	18	10	2	8	0.00255509		0	18	10	2	1	0.00324675
0	18	10	3	7	0.00223571		0	18	10	3	1	0.00324675
0	18	10	4	5	0.00159693		0	18	10	4	0	0
0	18	10	5	6	0.00191632		0	18	10	5	1	0.00324675
0	18	10	6	10	0.00319387		0	18	10	6	1	0.00324675
[truncated: 21,168 more rows]
